# Supplementary material for: New Thiazoline-Tetralin Derivatives and Biological Activity Evaluation
Source: MDPI journal article supplement (doi:10.3390/molecules23010135), 2018-01-10

## Supplementary document

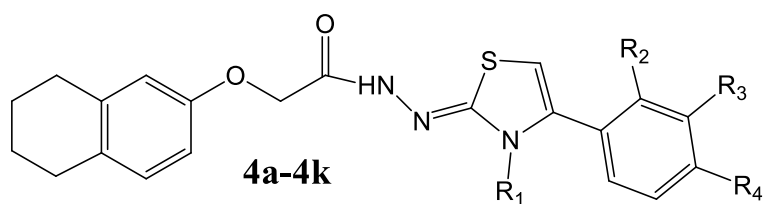

| Compounds | R <sub>1</sub> | R <sub>2</sub> | R <sub>3</sub>  | R <sub>4</sub>   |
|-----------|----------------|----------------|-----------------|------------------|
| <b>4a</b> | Cyclohexyl     | H              | H               | H                |
| <b>4b</b> | Cyclohexyl     | H              | H               | OCH <sub>3</sub> |
| <b>4c</b> | Phenyl         | H              | H               | H                |
| <b>4d</b> | Phenyl         | H              | H               | CH <sub>3</sub>  |
| <b>4e</b> | Phenyl         | H              | H               | OCH <sub>3</sub> |
| <b>4f</b> | Phenyl         | H              | H               | Br               |
| <b>4g</b> | Phenyl         | H              | H               | Cl               |
| <b>4h</b> | Phenyl         | H              | H               | F                |
| <b>4i</b> | Phenyl         | H              | NO <sub>2</sub> | H                |
| <b>4j</b> | Phenyl         | H              | H               | NO <sub>2</sub>  |
| <b>4k</b> | Phenyl         | Cl             | Cl              | H                |

## -IR spectrum of the compound 4a

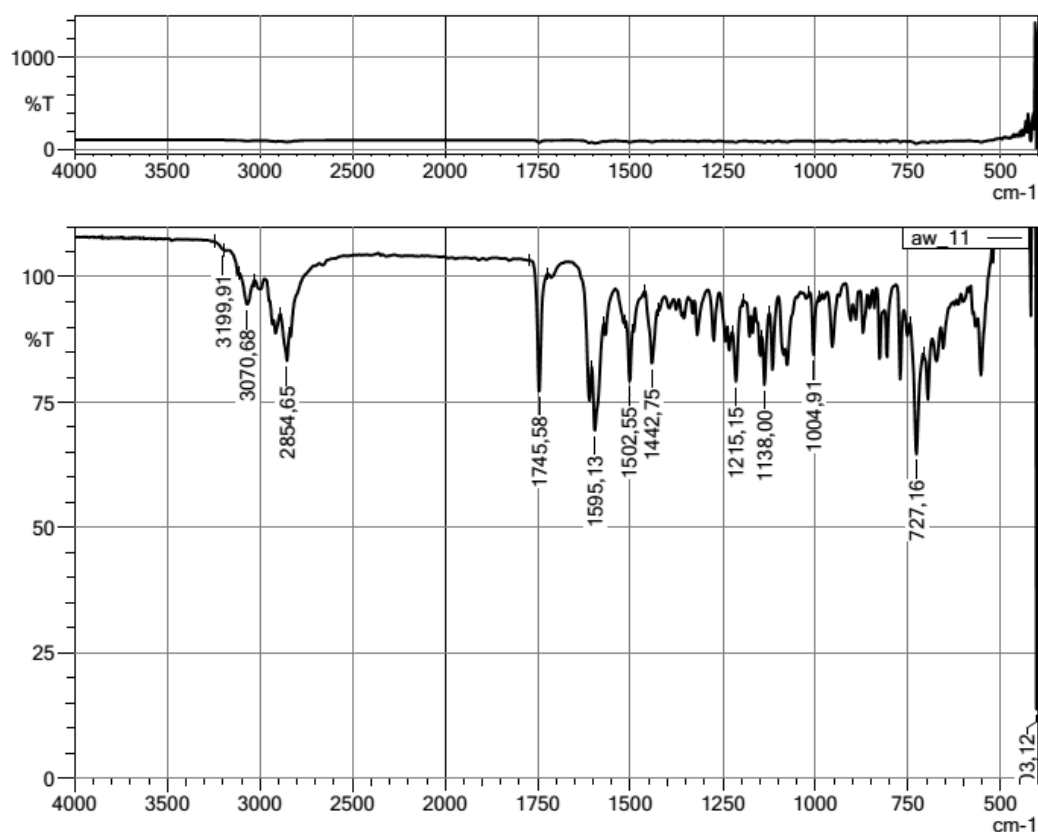

## - HRMS spectrum of the compound 4a

Data File: C:\LabSolutions\Data\Analiz\Lyuttas\AW-1\_1 lod

| Elmt | Val. | Min | Max | Elmt | Val. | Min | Max | Elmt | Val. | Min | Max | Elmt | Val. | Min | Max | Use Adduct |
|------|------|-----|-----|------|------|-----|-----|------|------|-----|-----|------|------|-----|-----|------------|
| H    | 1    | 20  | 35  | O    | 2    | 2   | 4   | Cl   | 1    | 0   | 1   | I    | 3    | 0   | 0   | H          |
| C    | 4    | 25  | 30  | F    | 1    | 0   | 1   | Br   | 1    | 0   | 1   |      |      |     |     |            |
| N    | 3    | 3   | 4   | S    | 2    | 1   | 1   | Ru   | 2    | 0   | 0   |      |      |     |     |            |

Error Margin (ppm): 5  
 HC Ratio: unlimited  
 Max Isotopes: 3  
 MSn Iso RI (%): 10.00

DBE Range: not fixed  
 Apply N Rule: yes  
 Isotope RI (%): 1.00  
 MSn Logic Mode: AND

Electron Ions: both  
 Use MSn Info: no  
 Isotope Res: 10000  
 Max Results: 500

Event#: 1 MS(E+) Ret. Time: 4.840 -> 4.960 Scan#: 727 -> 745

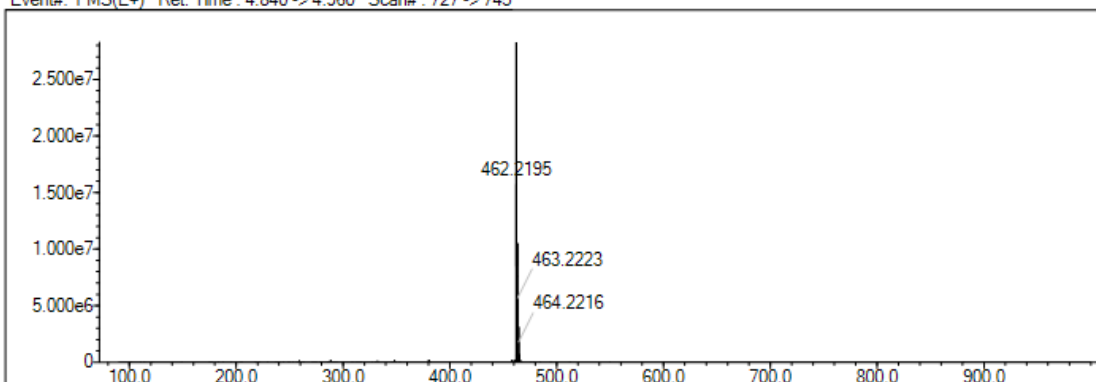

**$^1\text{H}$  NMR spectrum of the compound 4a**

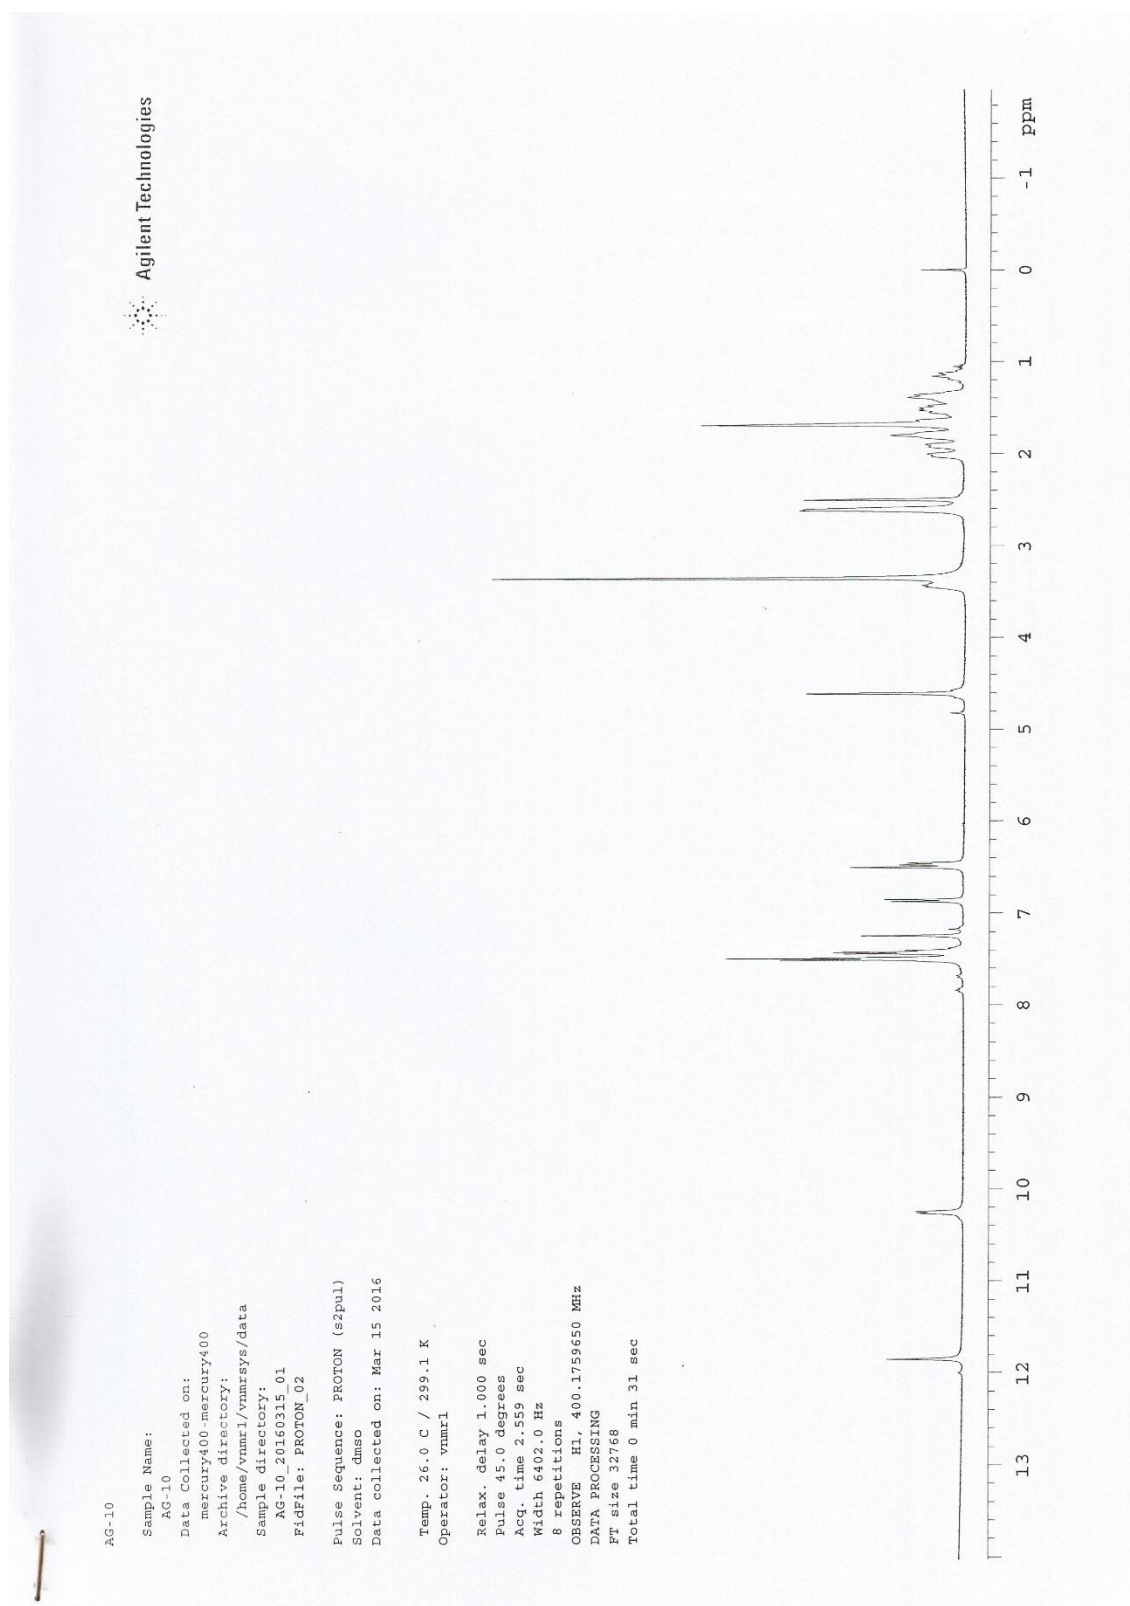

**$^{13}\text{C}$  NMR spectrum of the compound 4a**

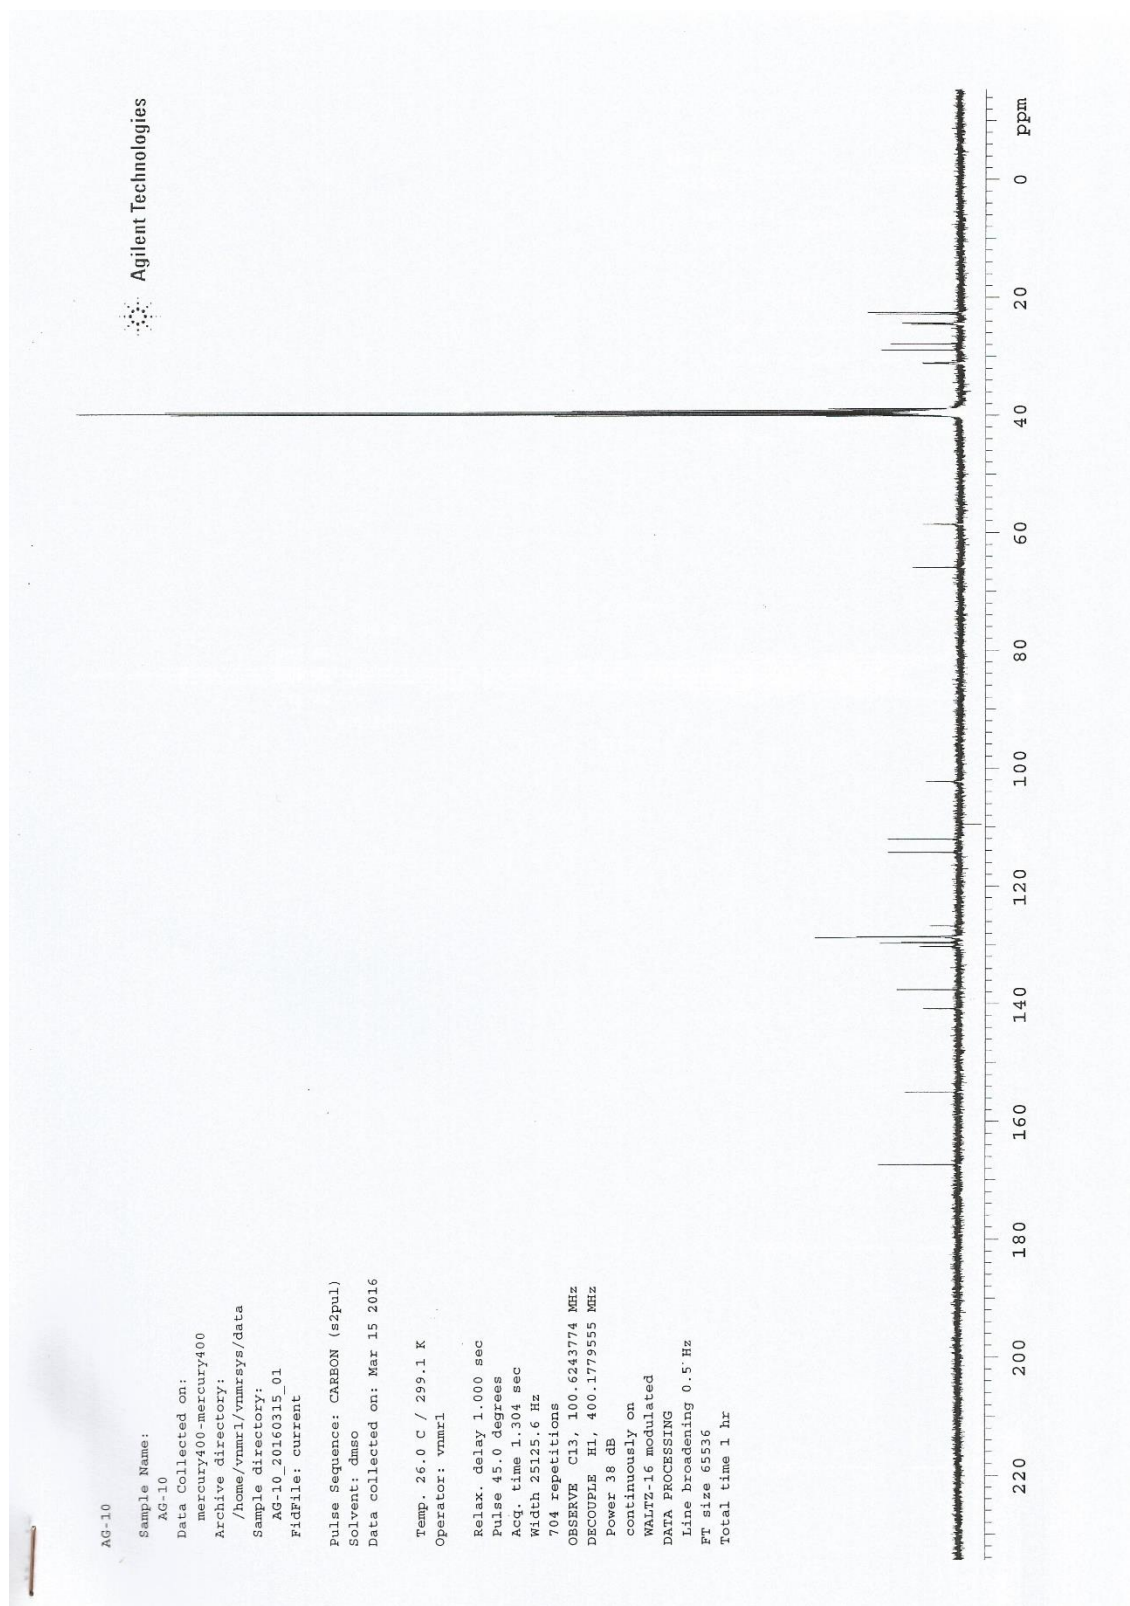

## -IR spectrum of the compound 4b

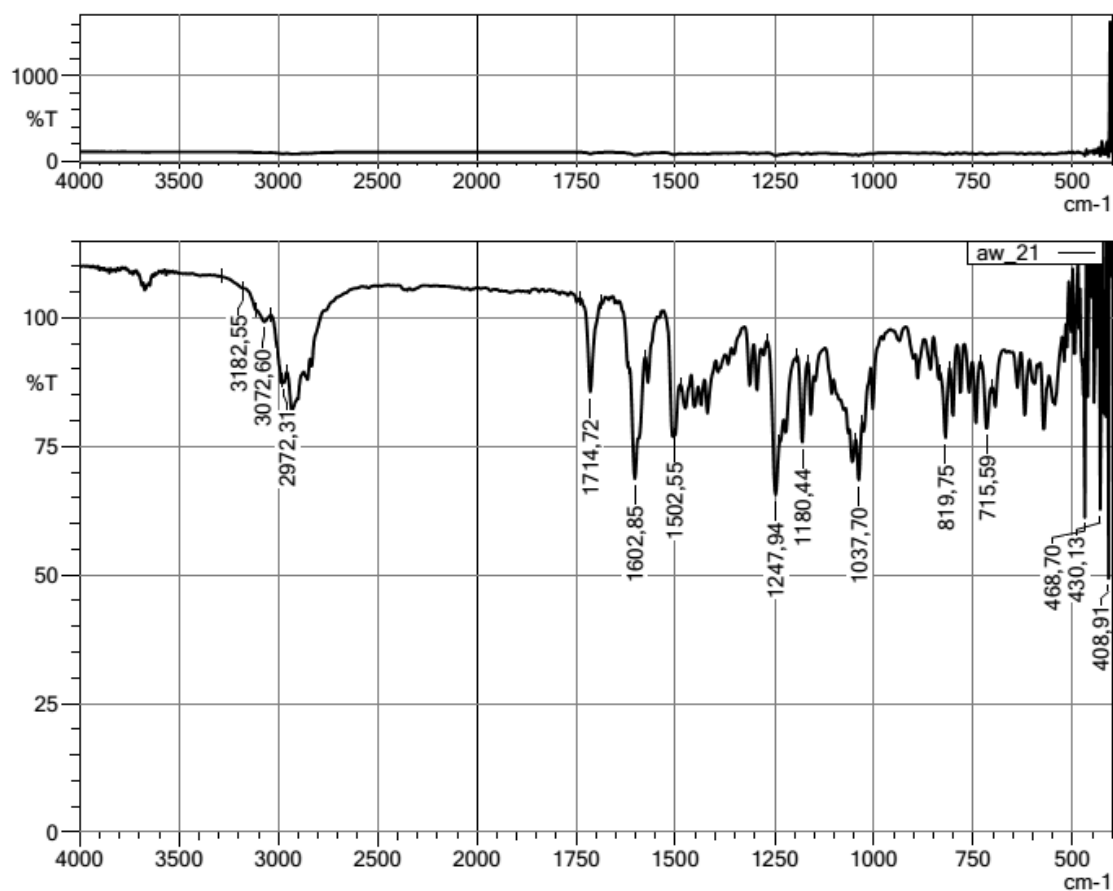

## -HRMS spectrum of the compound 4b

Data File: C:\LabSolutions\Data\Analiz\Lyuttas\AW-2\_2.lcd

| Elmt | Val. | Min | Max | Elmt | Val. | Min | Max | Elmt | Val. | Min | Max | Elmt | Val. | Min | Max | Use Adduct |
|------|------|-----|-----|------|------|-----|-----|------|------|-----|-----|------|------|-----|-----|------------|
| H    | 1    | 20  | 35  | O    | 2    | 2   | 4   | Cl   | 1    | 0   | 1   | I    | 3    | 0   | 0   | H          |
| C    | 4    | 25  | 30  | F    | 1    | 0   | 1   | Br   | 1    | 0   | 1   |      |      |     |     |            |
| N    | 3    | 3   | 4   | S    | 2    | 1   | 1   | Ru   | 2    | 0   | 0   |      |      |     |     |            |

Error Margin (ppm): 5  
 HC Ratio: unlimited  
 Max Isotopes: 3  
 MSn Iso RI (%): 10.00

DBE Range: not fixed  
 Apply N Rule: yes  
 Isotope RI (%): 1.00  
 MSn Logic Mode: AND

Electron Ions: both  
 Use MSn Info: no  
 Isotope Res: 10000  
 Max Results: 500

Event#: 1 MS(E+) Ret. Time : 4.933 -> 5.107 Scan#: 741 -> 767

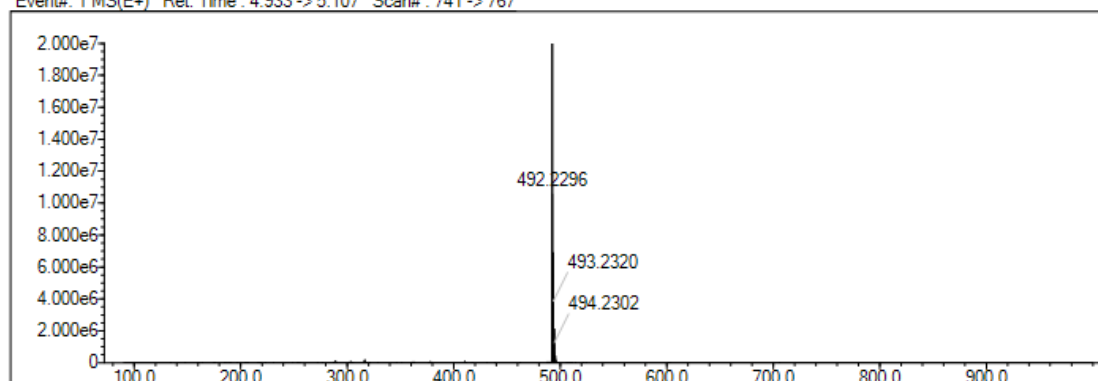

**$^1\text{H}$  NMR spectrum of the compound 4b**

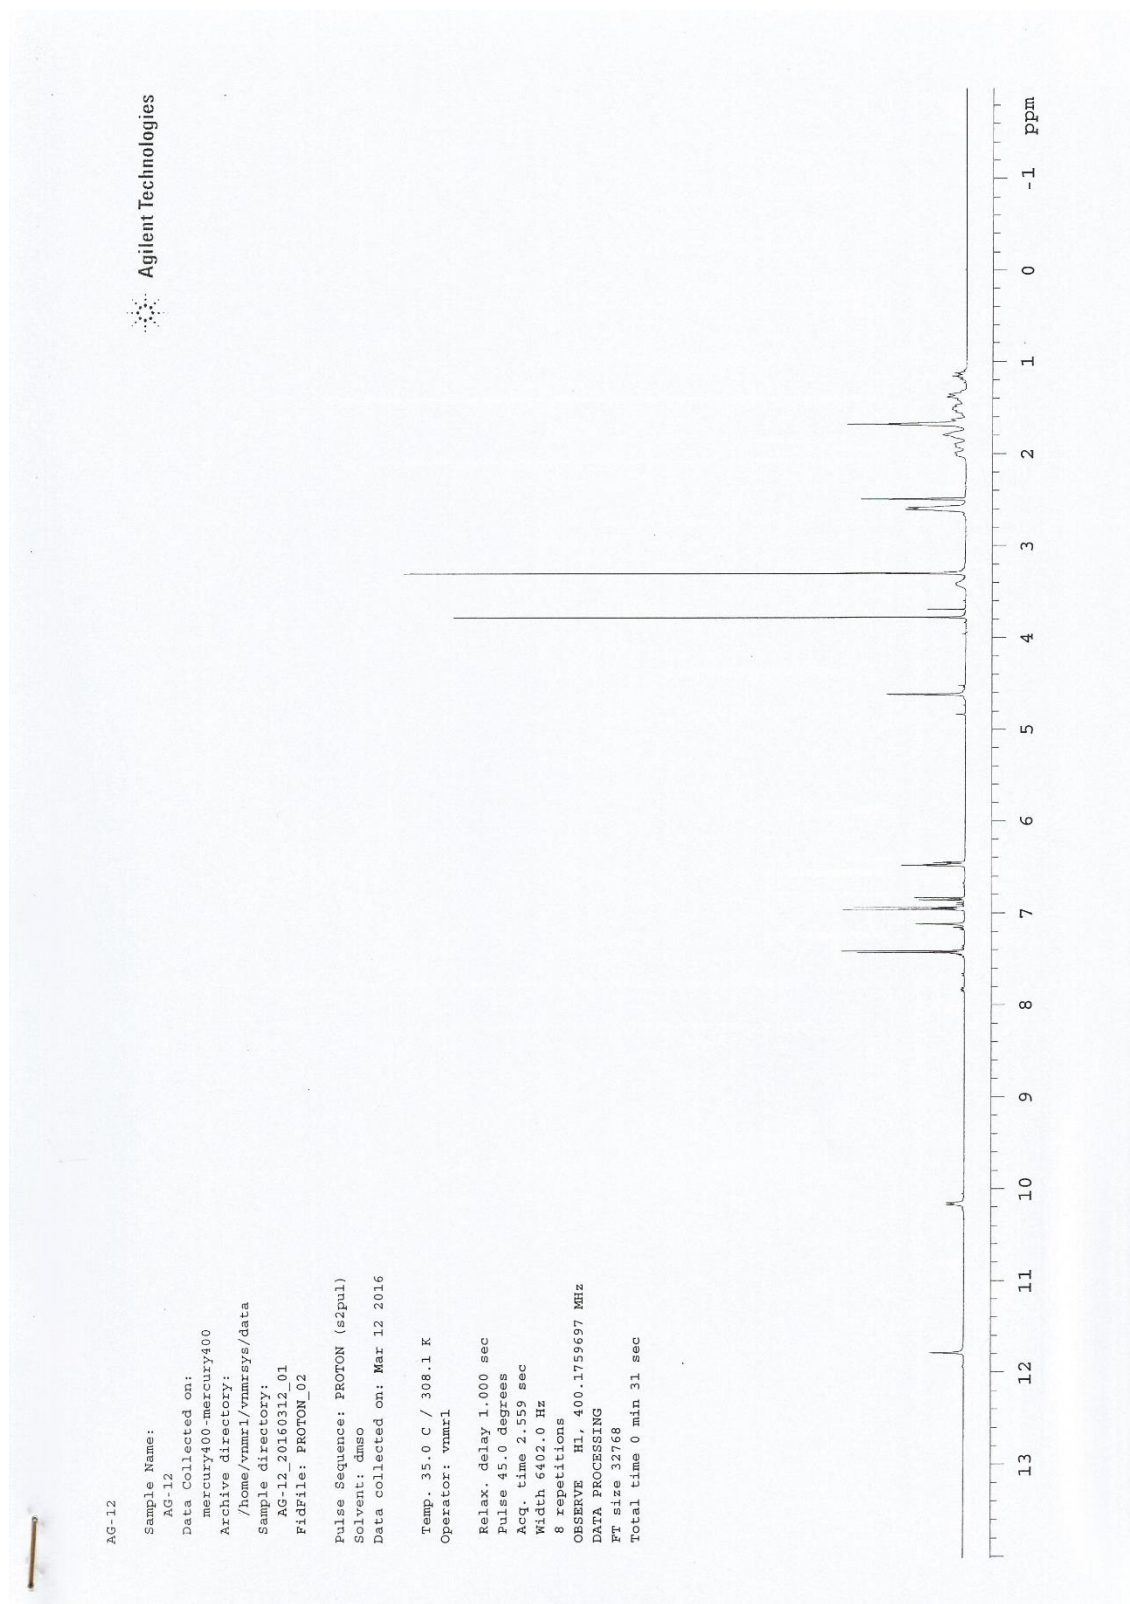



**$^{13}\text{C}$  NMR spectrum of the compound 4b**

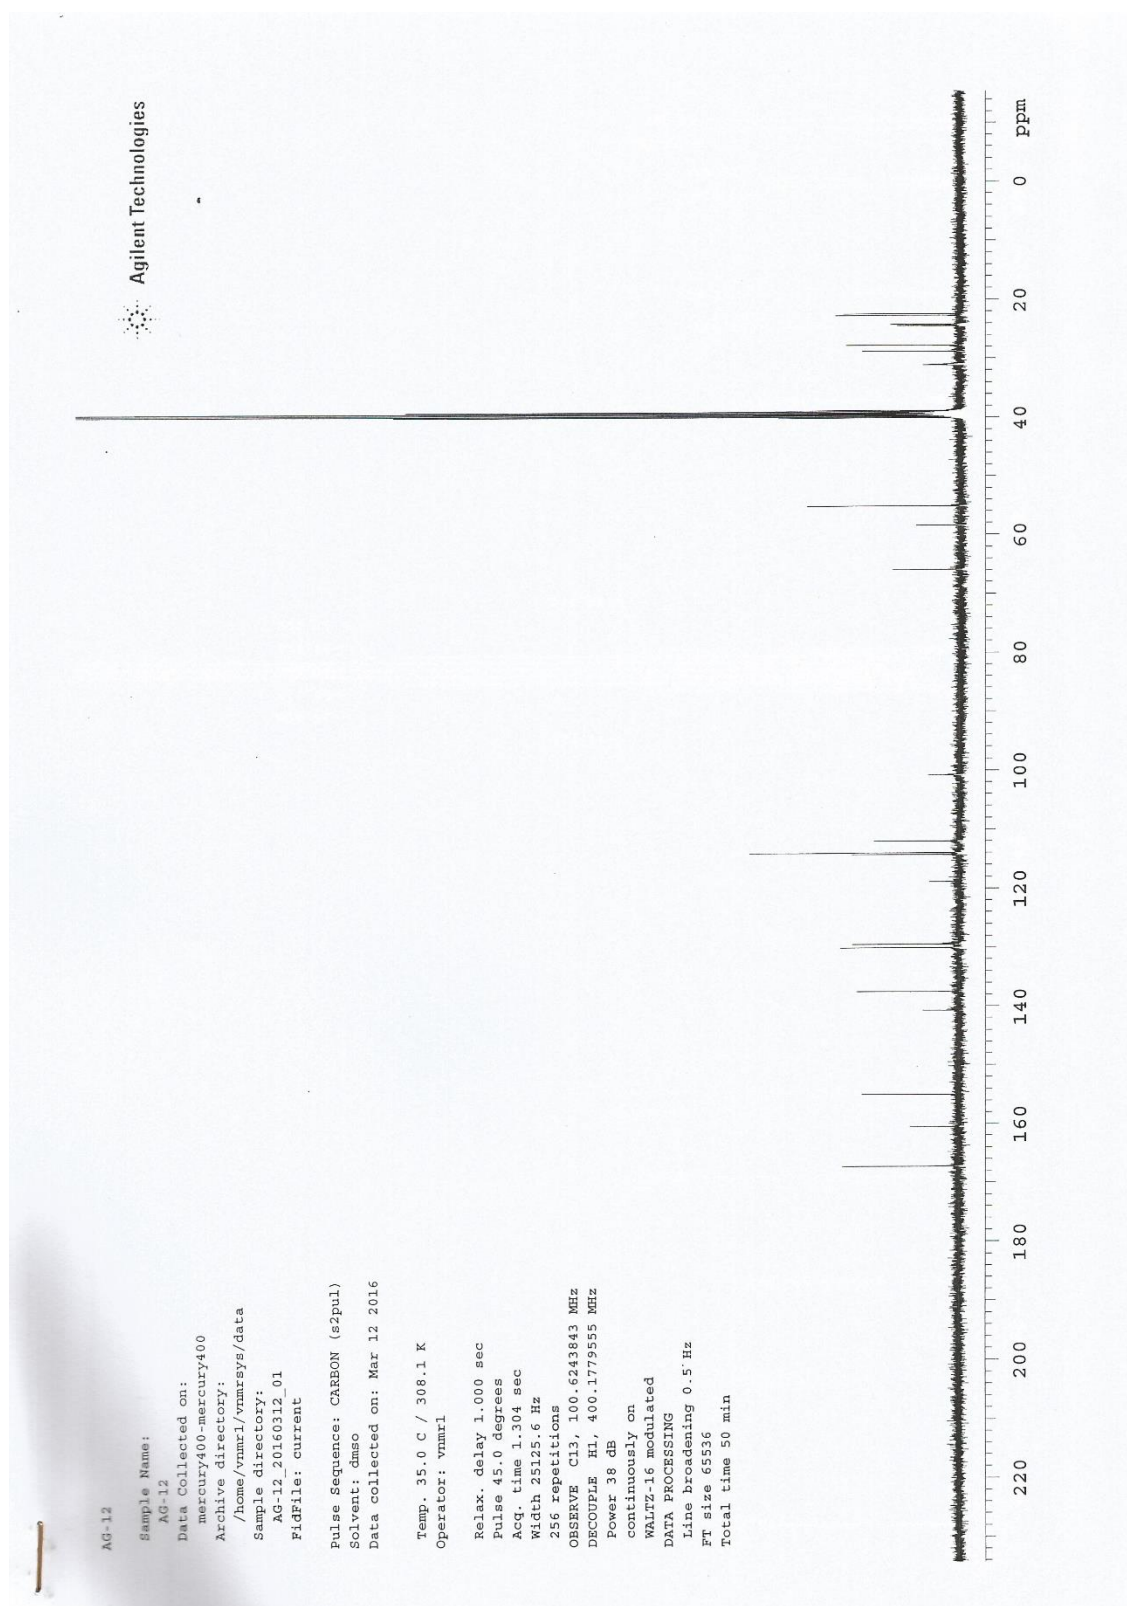

## - IR spectrum of the compound 4c

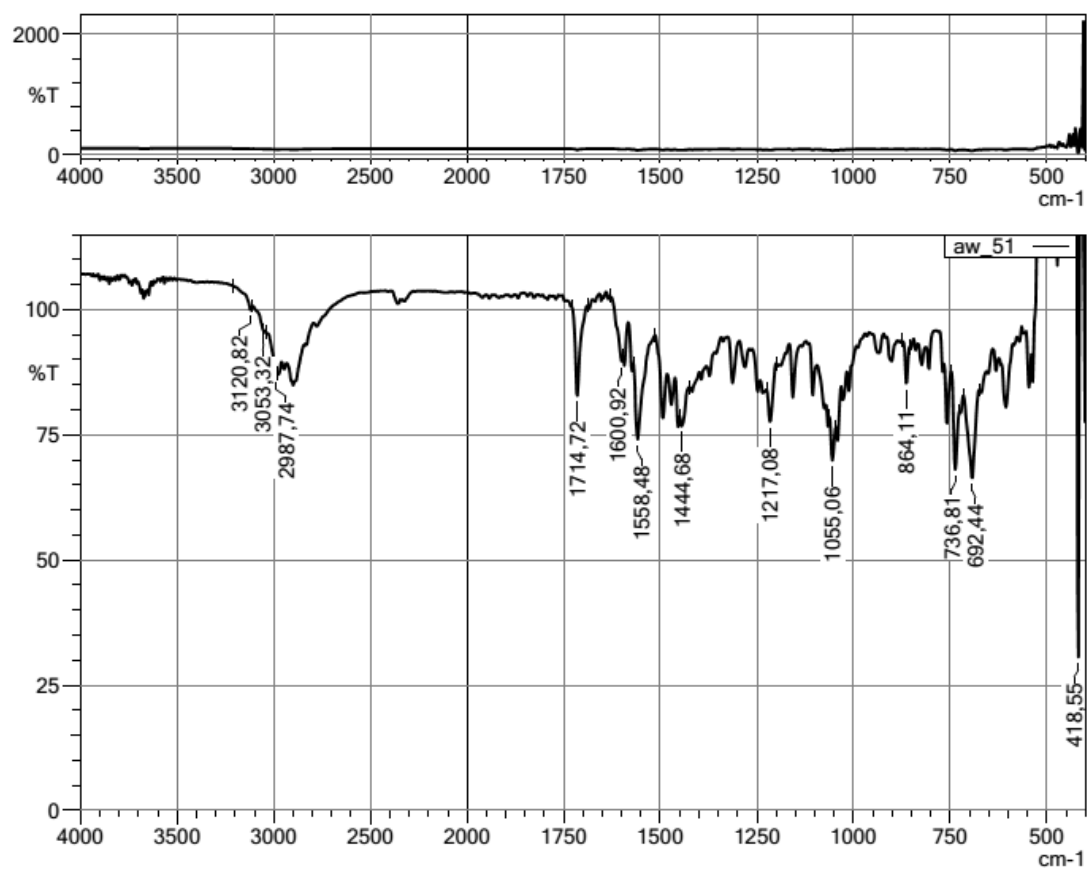

## HRMS spectrum of the compound 4c

Data File: C:\LabSolutions\Data\Analiz\Lyuttas\AW-5\_3.lcd

| Elmt | Val. | Min | Max | Elmt | Val. | Min | Max | Elmt | Val. | Min | Max | Elmt | Val. | Min | Max | Use Adduct |
|------|------|-----|-----|------|------|-----|-----|------|------|-----|-----|------|------|-----|-----|------------|
| H    | 1    | 20  | 35  | O    | 2    | 2   | 4   | Cl   | 1    | 0   | 1   | I    | 3    | 0   | 0   | H          |
| C    | 4    | 25  | 30  | F    | 1    | 0   | 1   | Br   | 1    | 0   | 1   |      |      |     |     |            |
| N    | 3    | 3   | 4   | S    | 2    | 1   | 1   | Ru   | 2    | 0   | 0   |      |      |     |     |            |

Error Margin (ppm): 5  
 HC Ratio: unlimited  
 Max Isotopes: 3  
 MSn Iso RI (%): 10.00

DBE Range: not fixed  
 Apply N Rule: yes  
 Isotope RI (%): 1.00  
 MSn Logic Mode: AND

Electron Ions: both  
 Use MSn Info: no  
 Isotope Res: 10000  
 Max Results: 500

Event#: 1 MS(E+) Ret. Time: 7.320 -> 7.507 Scan#: 1099 -> 1127

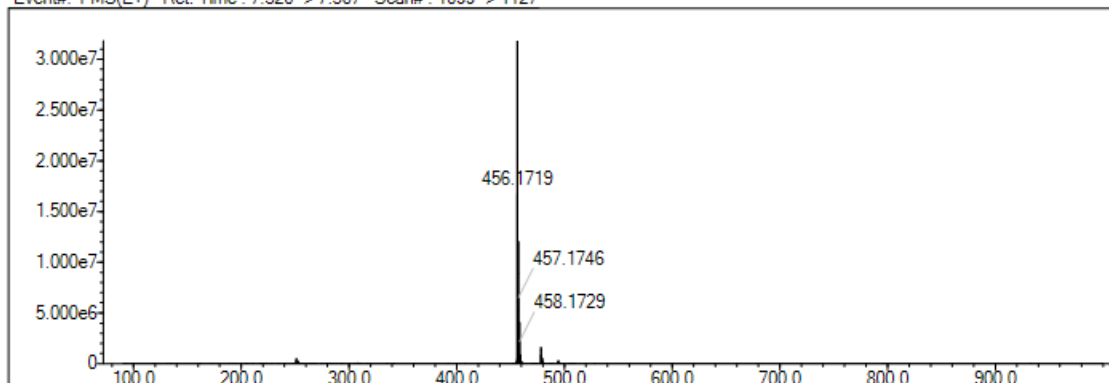



**$^1\text{H}$  NMR spectrum of the compound 4c**

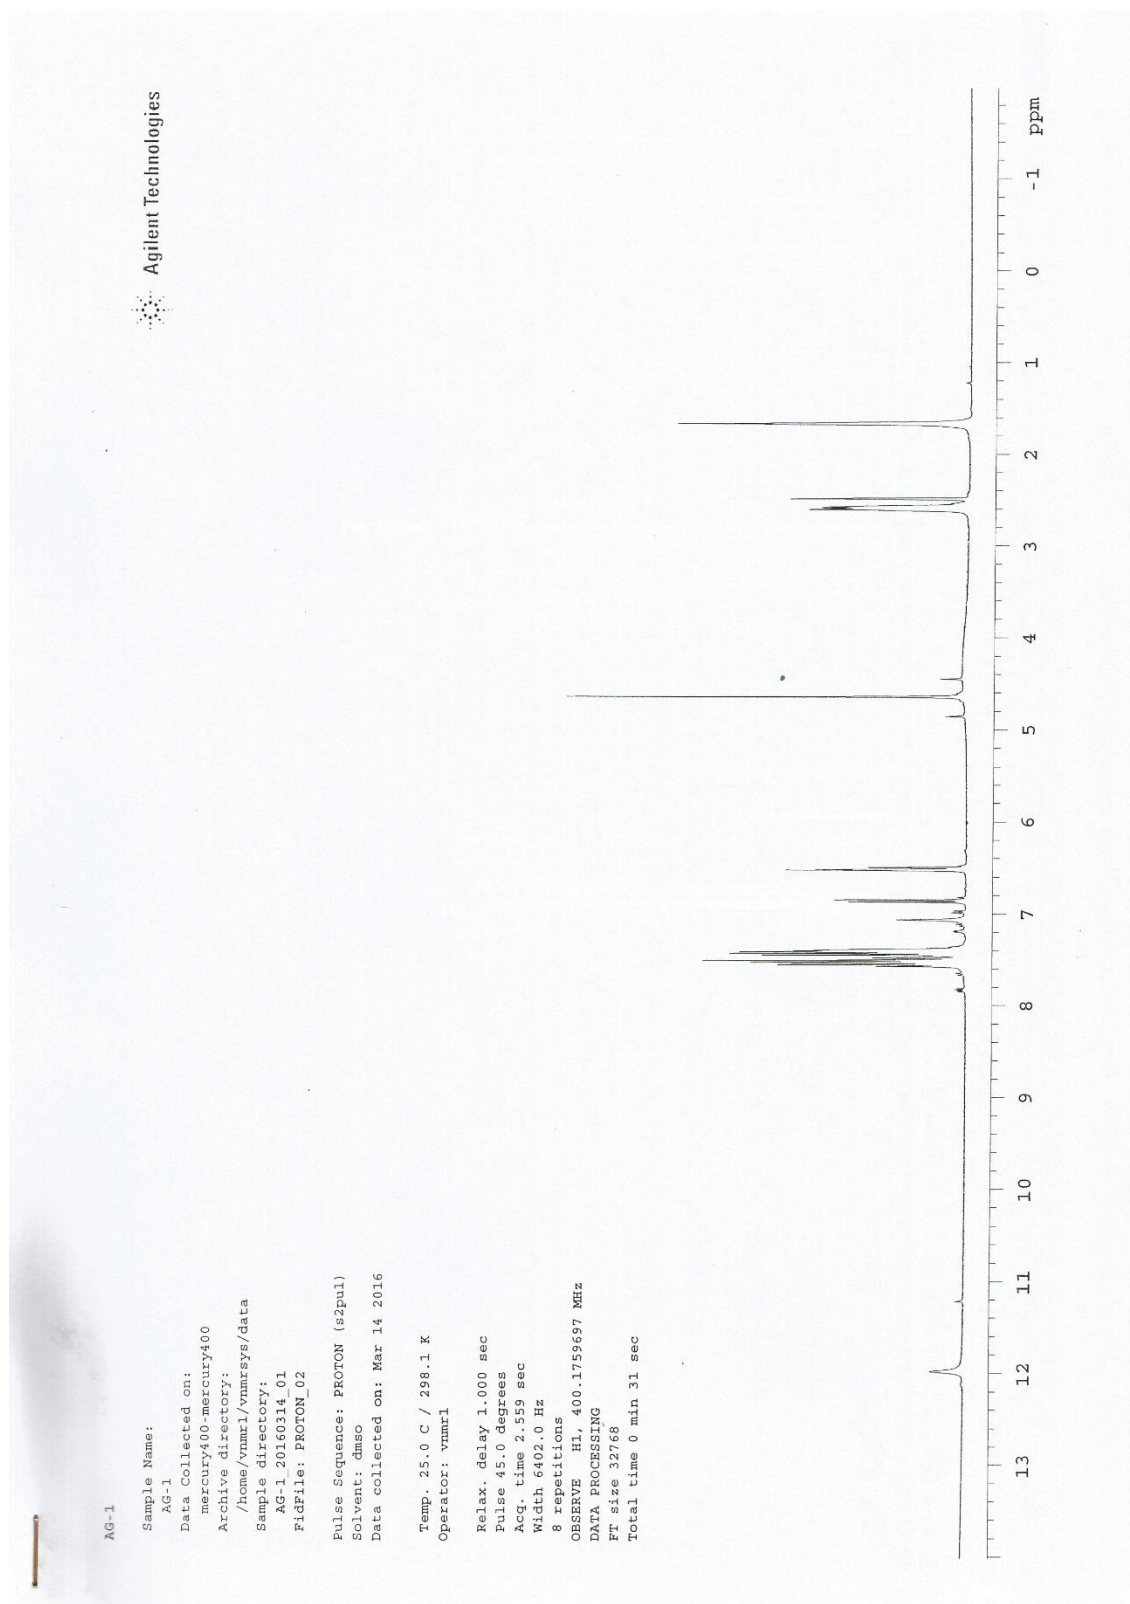

**$^{13}\text{C}$  NMR spectrum of the compound 4c**

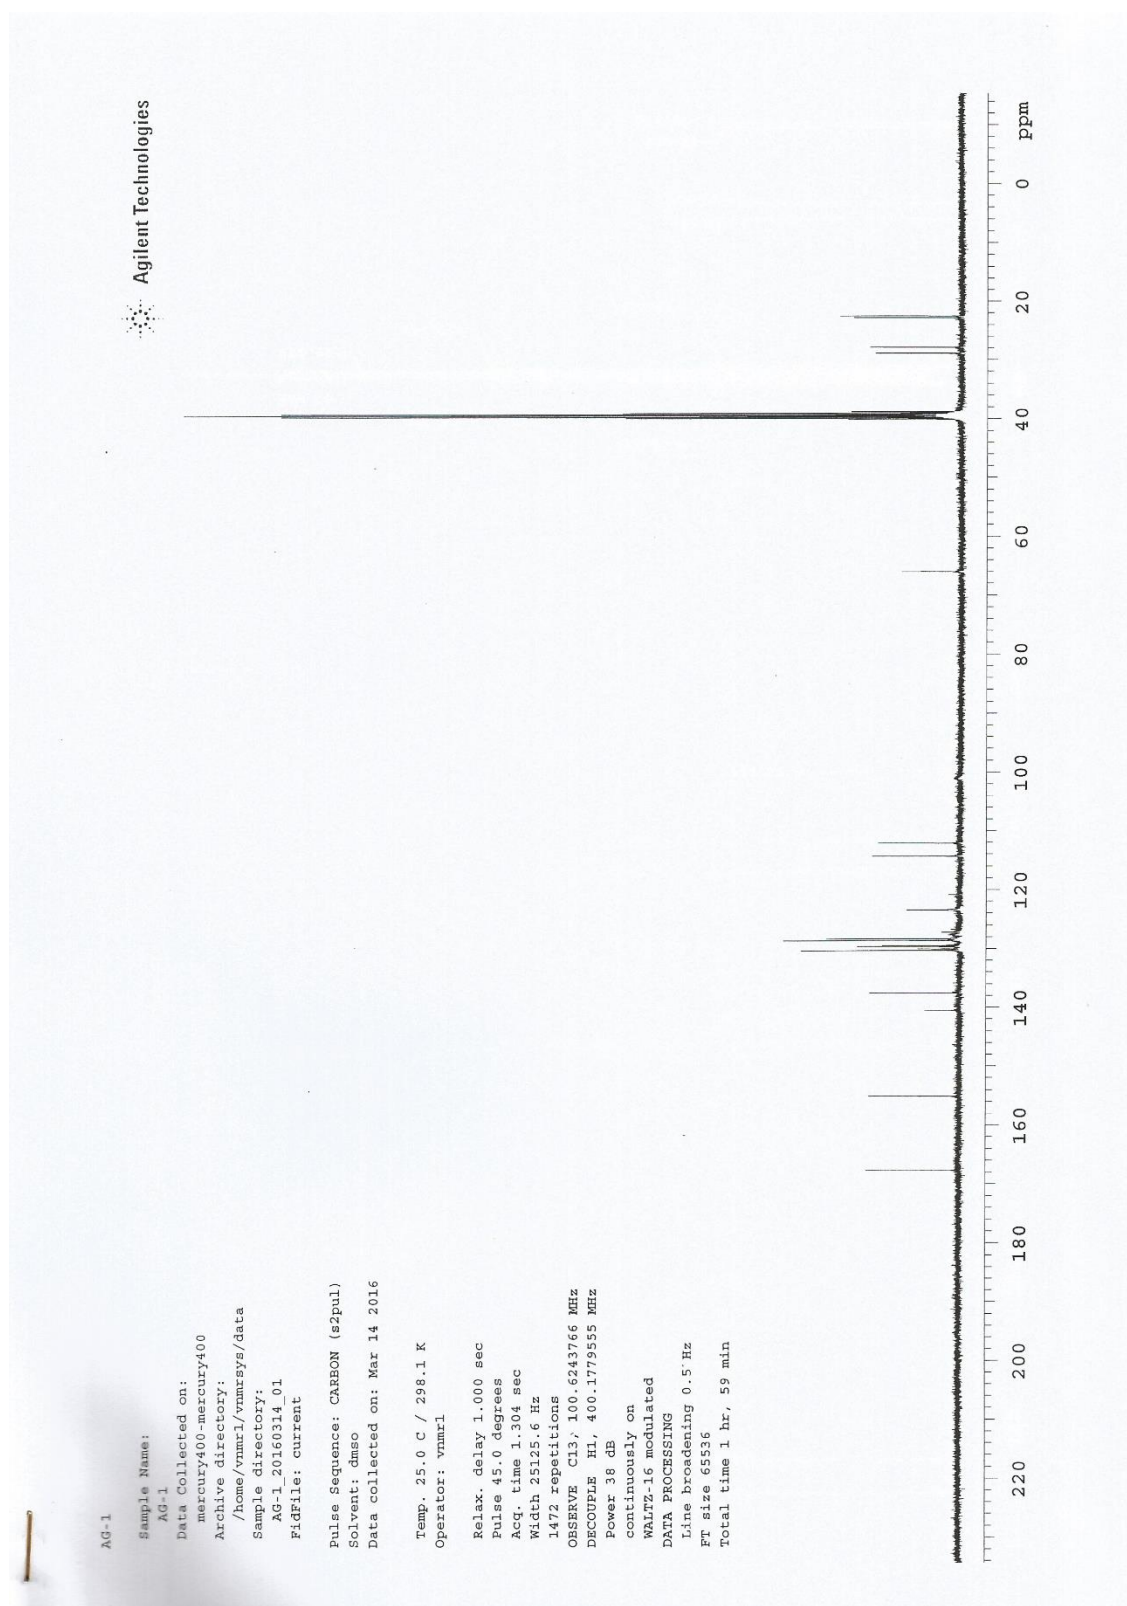

## - IR spectrum of the compound 4d

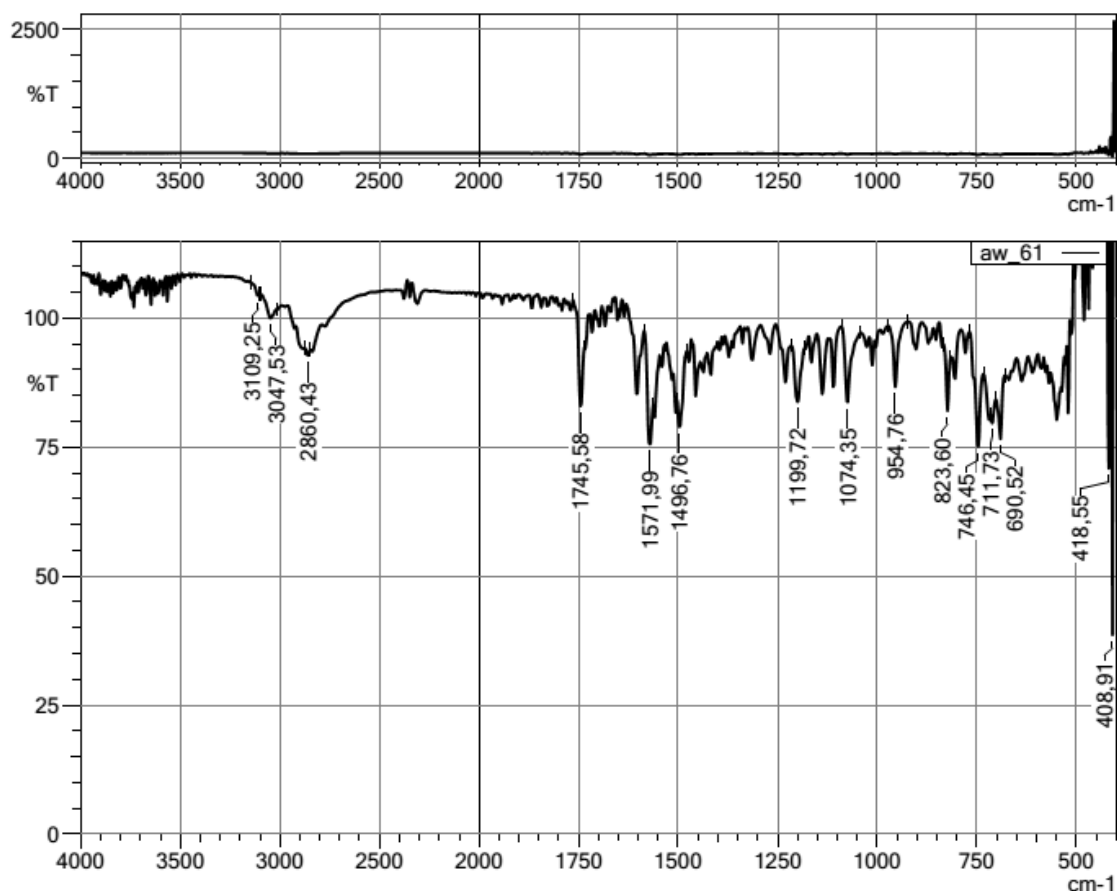

## -HRMS spectrum of the compound 4d

Data File: C:\LabSolutions\Data\Analiz\Lyuttas\AW-6\_4.lcd

| Elmt | Val. | Min | Max | Elmt | Val. | Min | Max | Elmt | Val. | Min | Max | Elmt | Val. | Min | Max | Use Adduct |
|------|------|-----|-----|------|------|-----|-----|------|------|-----|-----|------|------|-----|-----|------------|
| H    | 1    | 20  | 35  | O    | 2    | 2   | 4   | Cl   | 1    | 0   | 1   | I    | 3    | 0   | 0   | H          |
| C    | 4    | 26  | 30  | F    | 1    | 0   | 1   | Br   | 1    | 0   | 1   |      |      |     |     |            |
| N    | 3    | 3   | 4   | S    | 2    | 1   | 1   | Ru   | 2    | 0   | 0   |      |      |     |     |            |

Error Margin (ppm): 5  
 HC Ratio: unlimited  
 Max Isotopes: 3  
 MSn Iso RI (%): 10.00

DBE Range: not fixed  
 Apply N Rule: yes  
 Isotope RI (%): 1.00  
 MSn Logic Mode: AND

Electron Ions: both  
 Use MSn Info: no  
 Isotope Res: 10000  
 Max Results: 500

Event#: 1 MS(E+) Ret. Time : 7.520 -> 7.733 Scan#: 1129 -> 1161

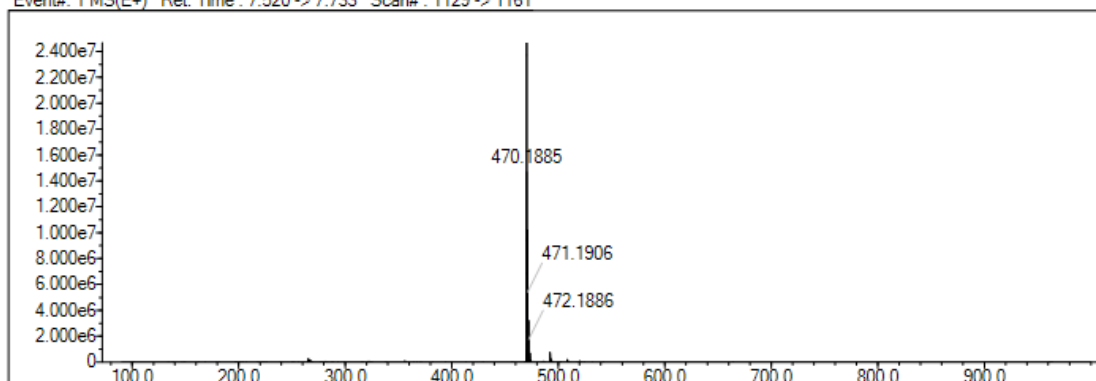

**$^1\text{H}$  NMR spectrum of the compound 4d**

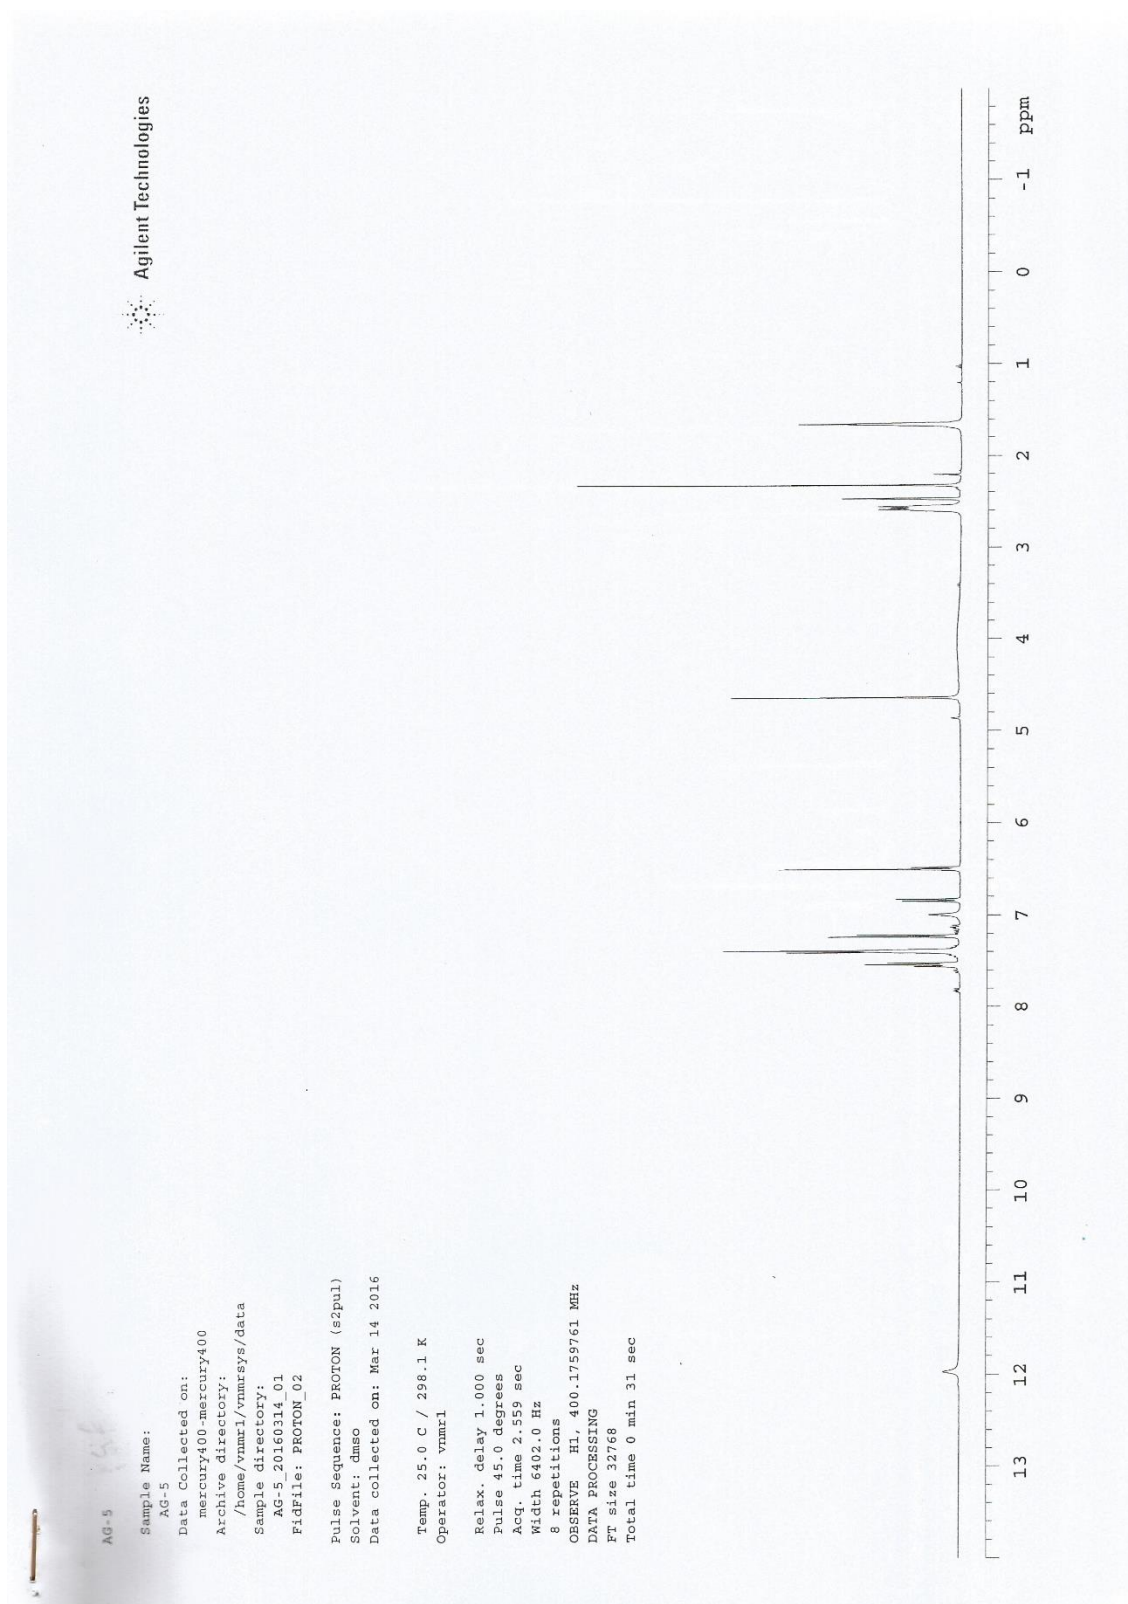



**$^{13}\text{C}$  NMR spectrum of the compound 4d**

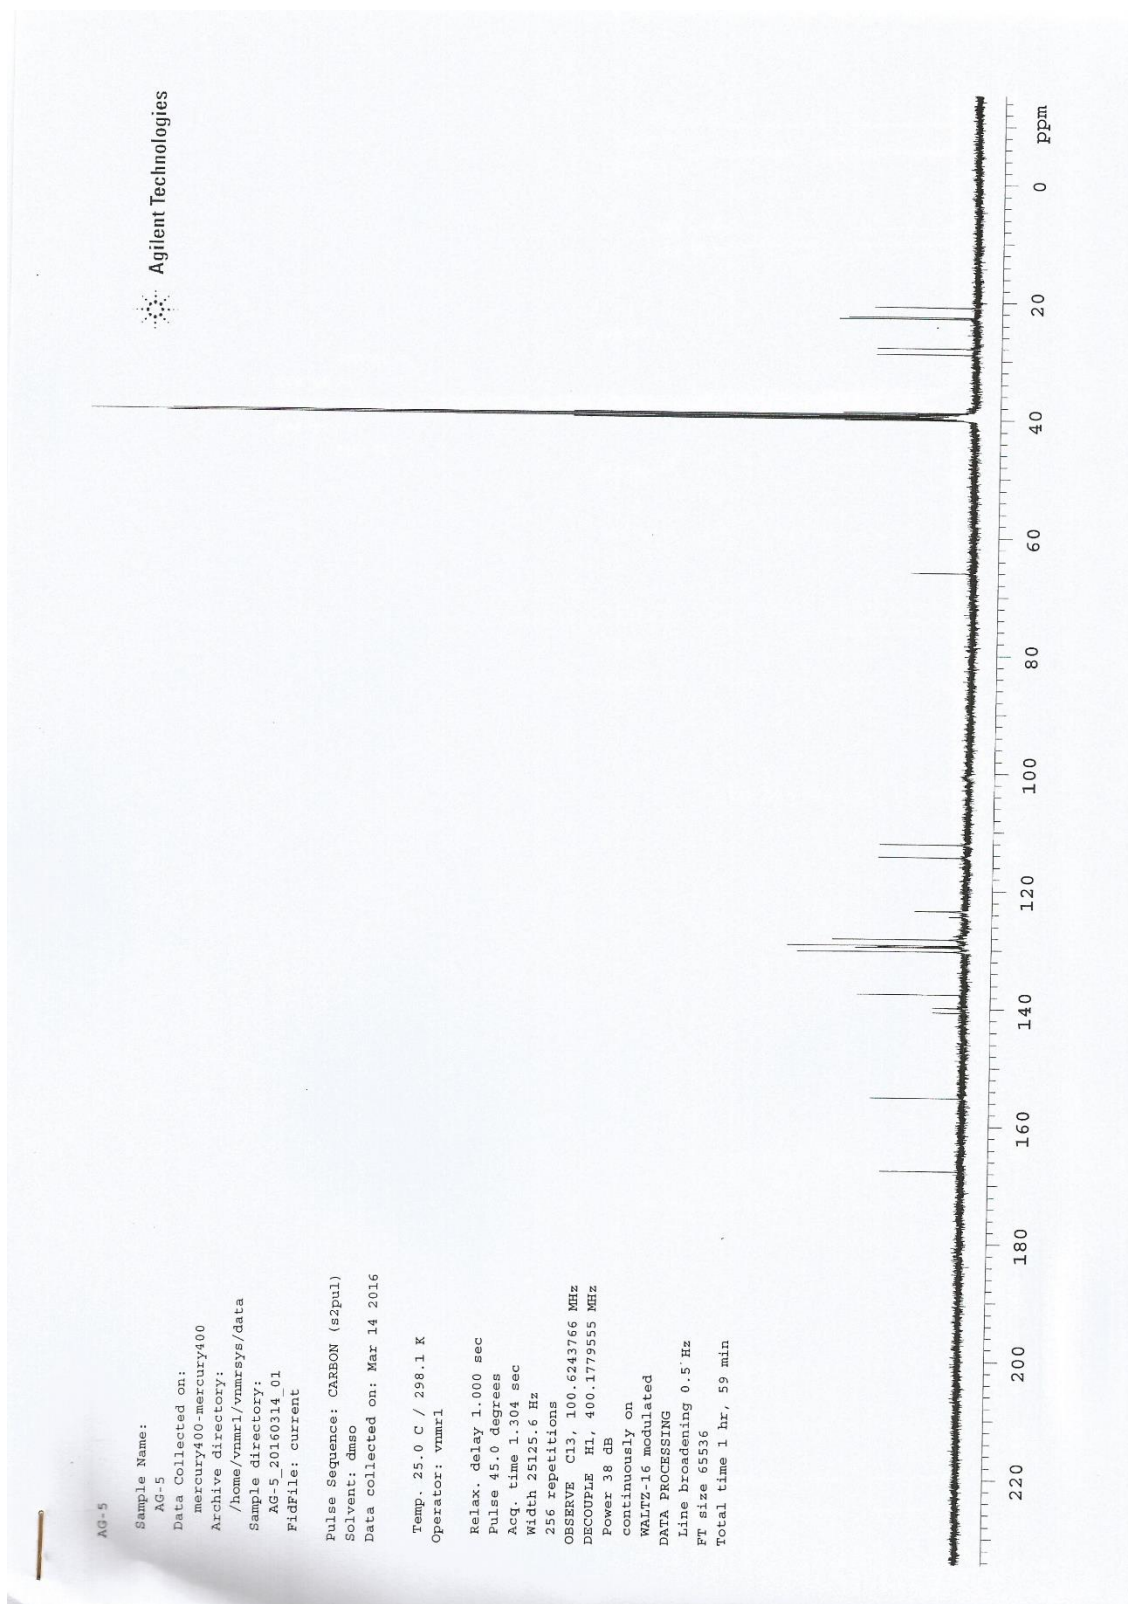

## -IR spectrum of the compound 4e

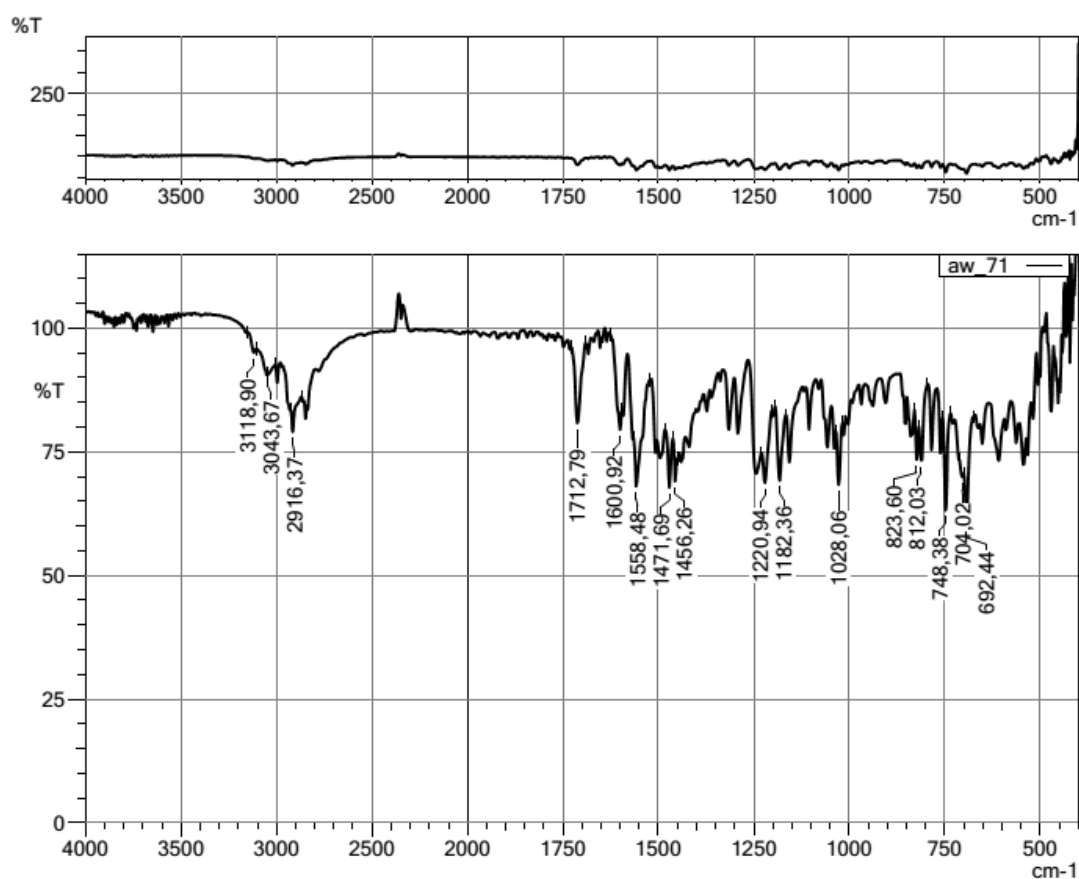

## -HRMS spectrum of the compound 4e

Data File: C:\LabSolutions\Data\Analiz\Lyuttas\AW-7\_5.lcd

| Elmt | Val. | Min | Max | Elmt | Val. | Min | Max | Elmt | Val. | Min | Max | Elmt | Val. | Min | Max | Use Adduct |
|------|------|-----|-----|------|------|-----|-----|------|------|-----|-----|------|------|-----|-----|------------|
| H    | 1    | 20  | 35  | O    | 2    | 2   | 4   | Cl   | 1    | 0   | 1   | I    | 3    | 0   | 0   | H          |
| C    | 4    | 26  | 30  | F    | 1    | 0   | 1   | Br   | 1    | 0   | 1   |      |      |     |     |            |
| N    | 3    | 3   | 4   | S    | 2    | 1   | 1   | Ru   | 2    | 0   | 0   |      |      |     |     |            |

Error Margin (ppm): 5  
 HC Ratio: unlimited  
 Max Isotopes: 3  
 MSn Iso RI (%): 10.00

DBE Range: not fixed  
 Apply N Rule: yes  
 Isotope RI (%): 1.00  
 MSn Logic Mode: AND

Electron Ions: both  
 Use MSn Info: no  
 Isotope Res: 10000  
 Max Results: 500

Event#: 1 MS(E+) Ret. Time : 7.067 -> 7.387 Scan#: 1061 -> 1109

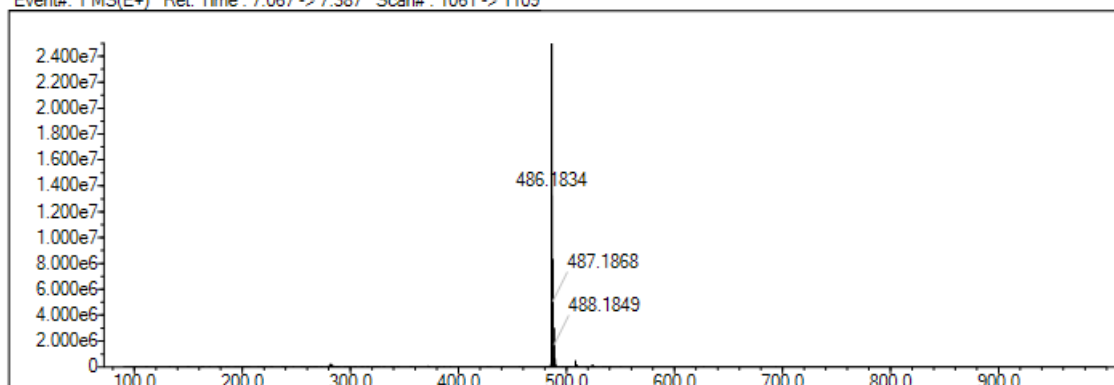



**$^1\text{H}$  NMR spectrum of the compound 4e**

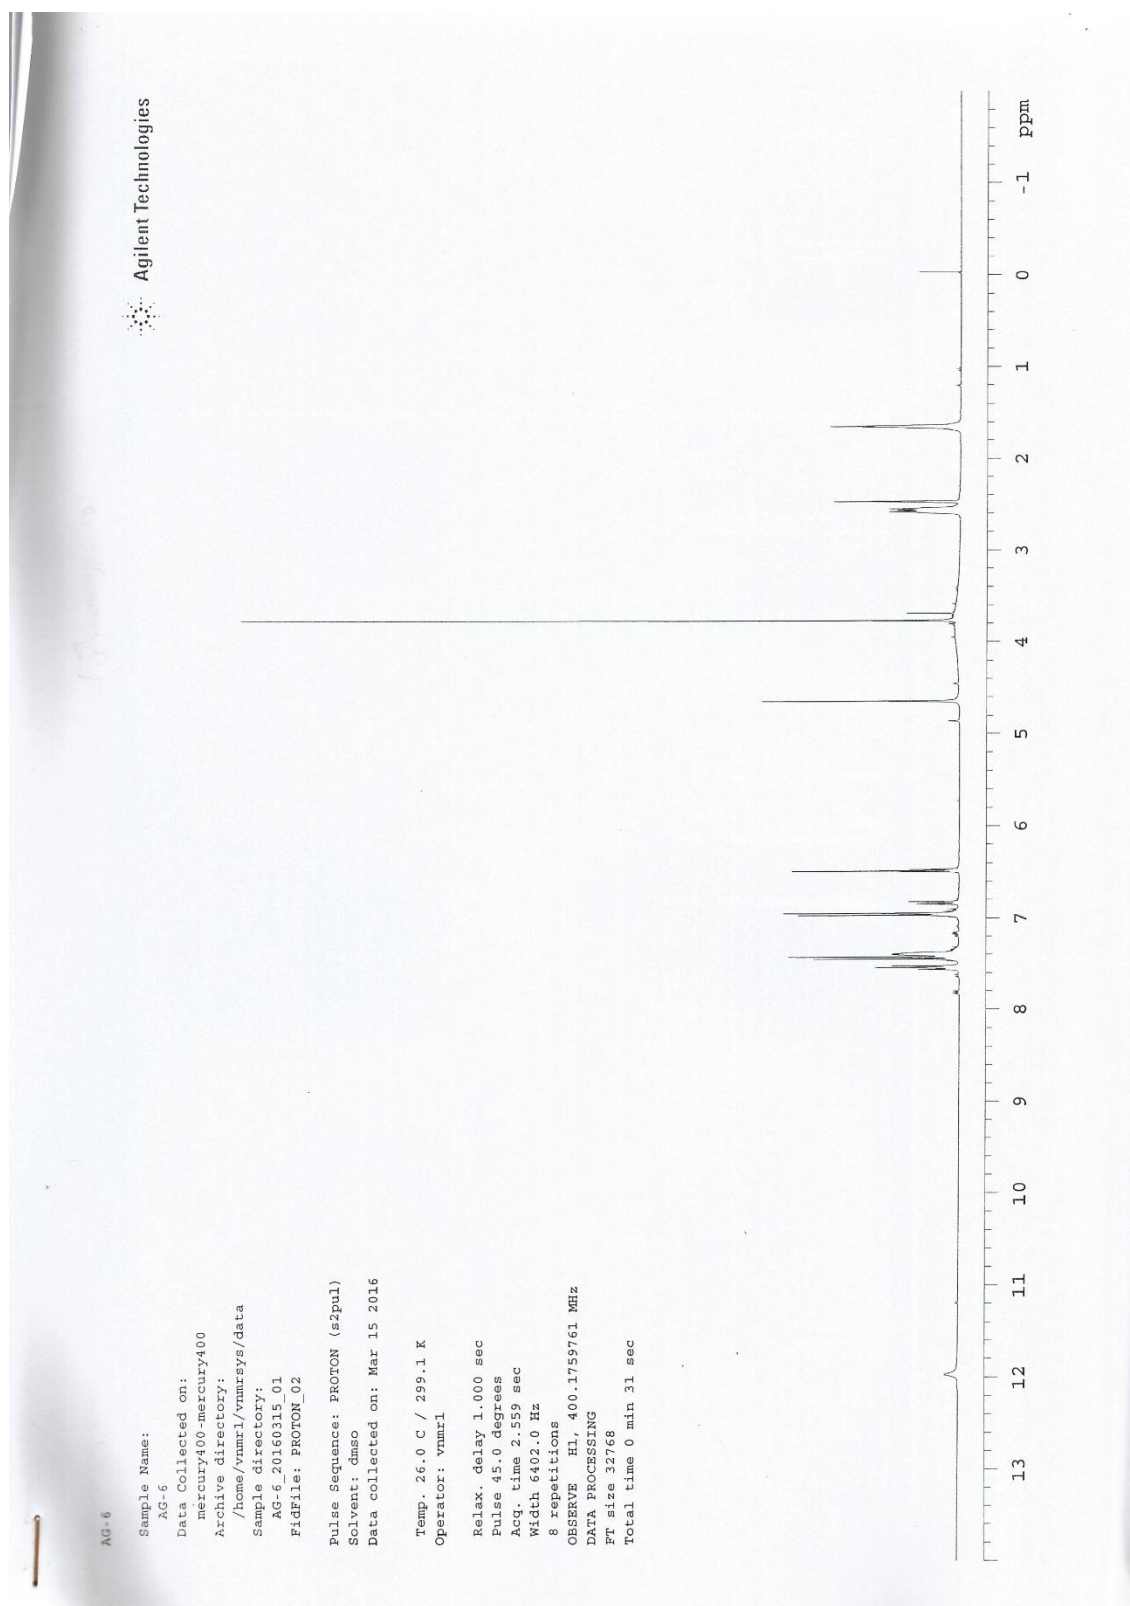

**$^{13}\text{C}$  NMR spectrum of the compound 4e**

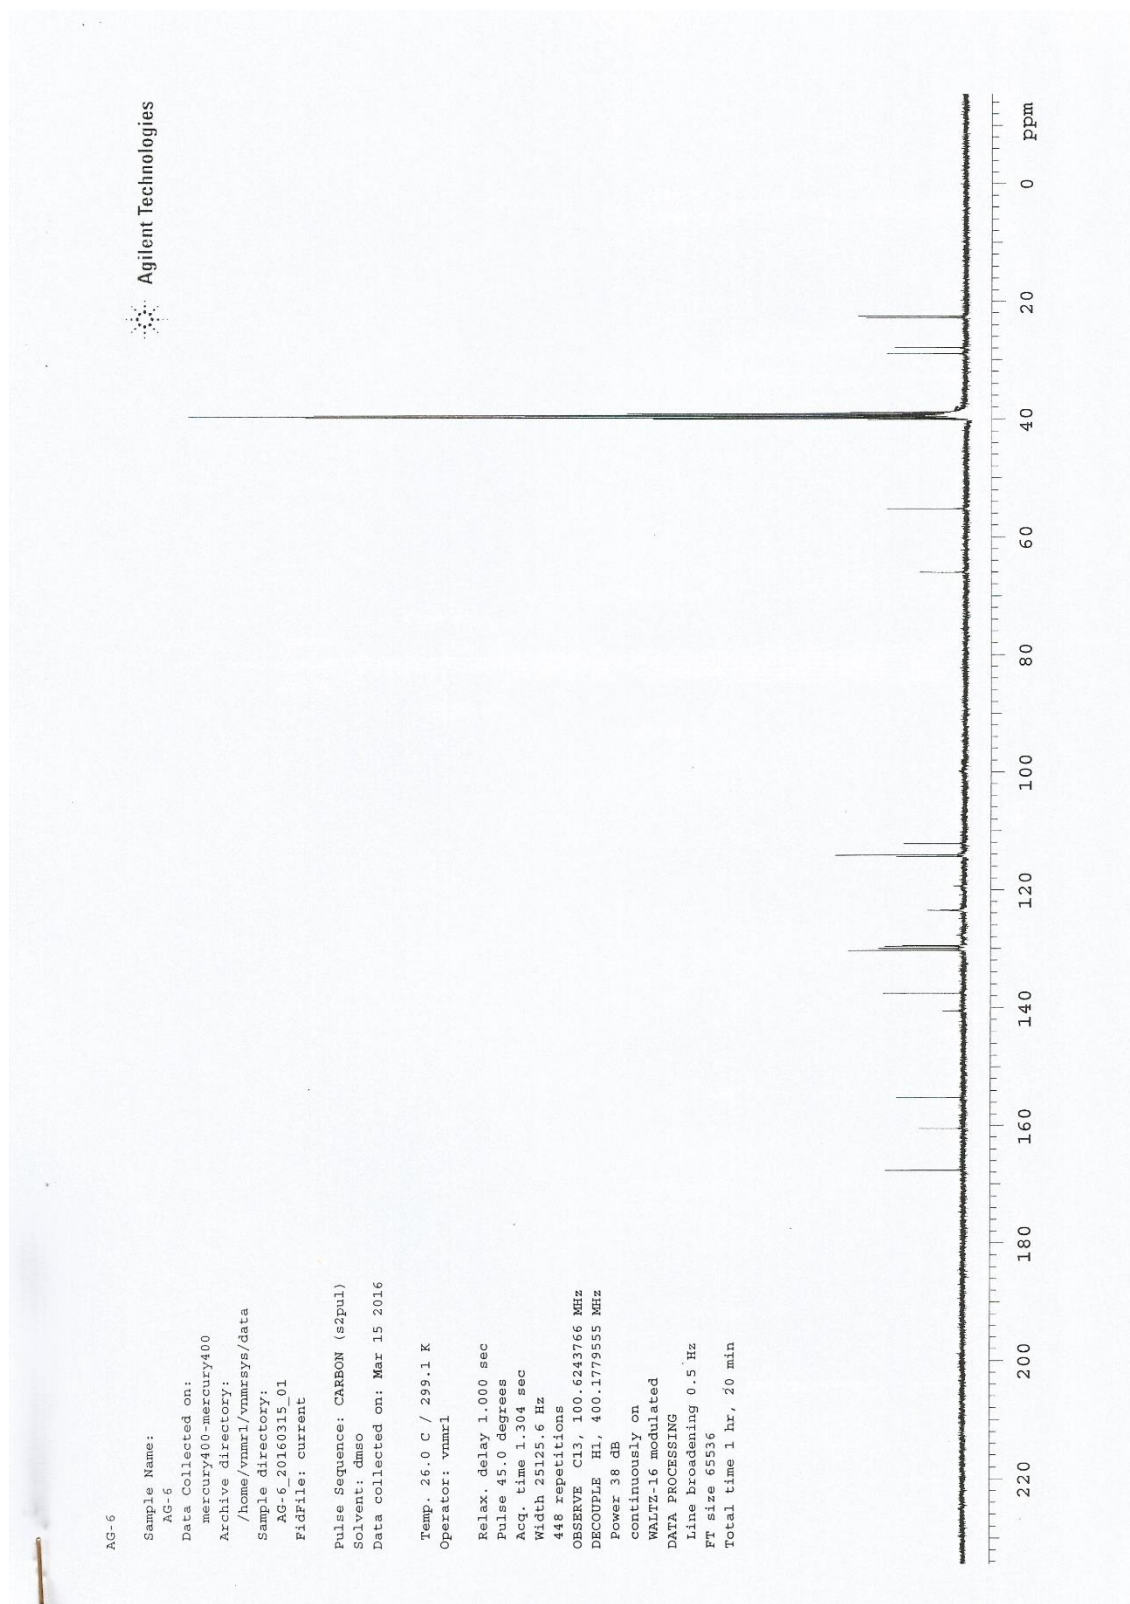

# **-IR spectrum of the compound 4f**

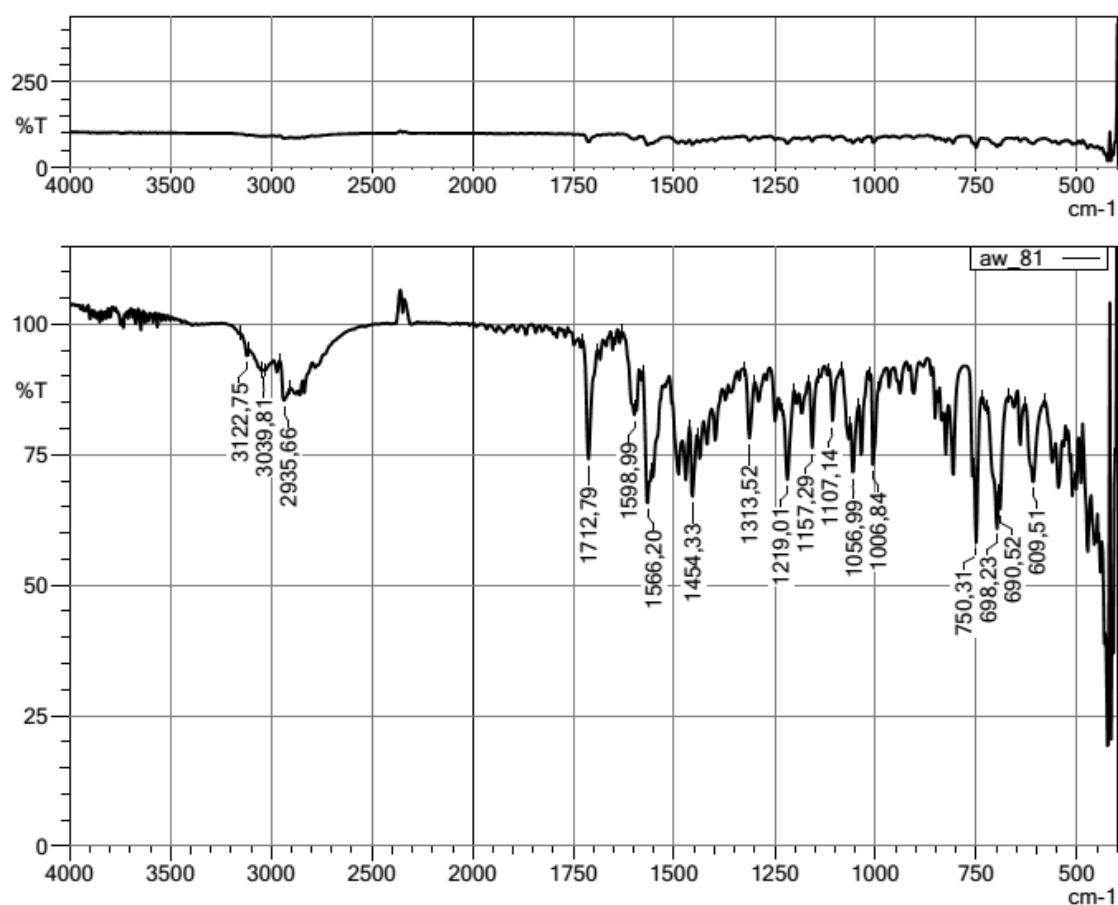

# **-HRMS spectrum of the compound 4f**

Data File: C:\LabSolutions\Data\Analiz\Lyuttas\AW-8\_9.lcd

| Elmt | Val | Mini | Max | Elmt | Val | Mini | Max | Elmt | Val | Mini | Max | Elmt | Val | Mini | Max | Use Adduct |
|------|-----|------|-----|------|-----|------|-----|------|-----|------|-----|------|-----|------|-----|------------|
| H    | 1   | 20   | 35  | O    | 2   | 2    | 4   | Cl   | 1   | 0    | 1   | I    | 3   | 0    | 0   | H          |
| C    | 4   | 26   | 30  | F    | 1   | 0    | 1   | Br   | 1   | 0    | 1   |      |     |      |     |            |
| N    | 3   | 3    | 4   | S    | 2   | 1    | 1   | Ru   | 2   | 0    | 0   |      |     |      |     |            |

Error Margin (ppm): 5  
 HC Ratio: unlimited  
 Max Isotopes: 3  
 MSn Iso RI (%): 10.00

DBE Range: not fixed  
 Apply N Rule: yes  
 Isotope RI (%): 1.00  
 MSn Logic Mode: AND

Electron Ions: both  
 Use MSn Info: no  
 Isotope Res: 10000  
 Max Results: 500

Event#: 1 MS(E+) Ret. Time: 7.987 -> 8.187 Scan#: 1199 -> 1229

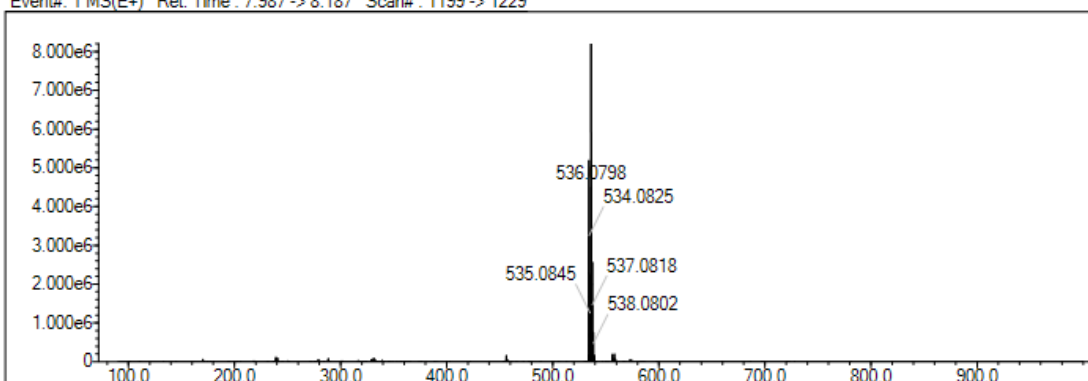

**$^1\text{H}$  NMR spectrum of the compound 4f**

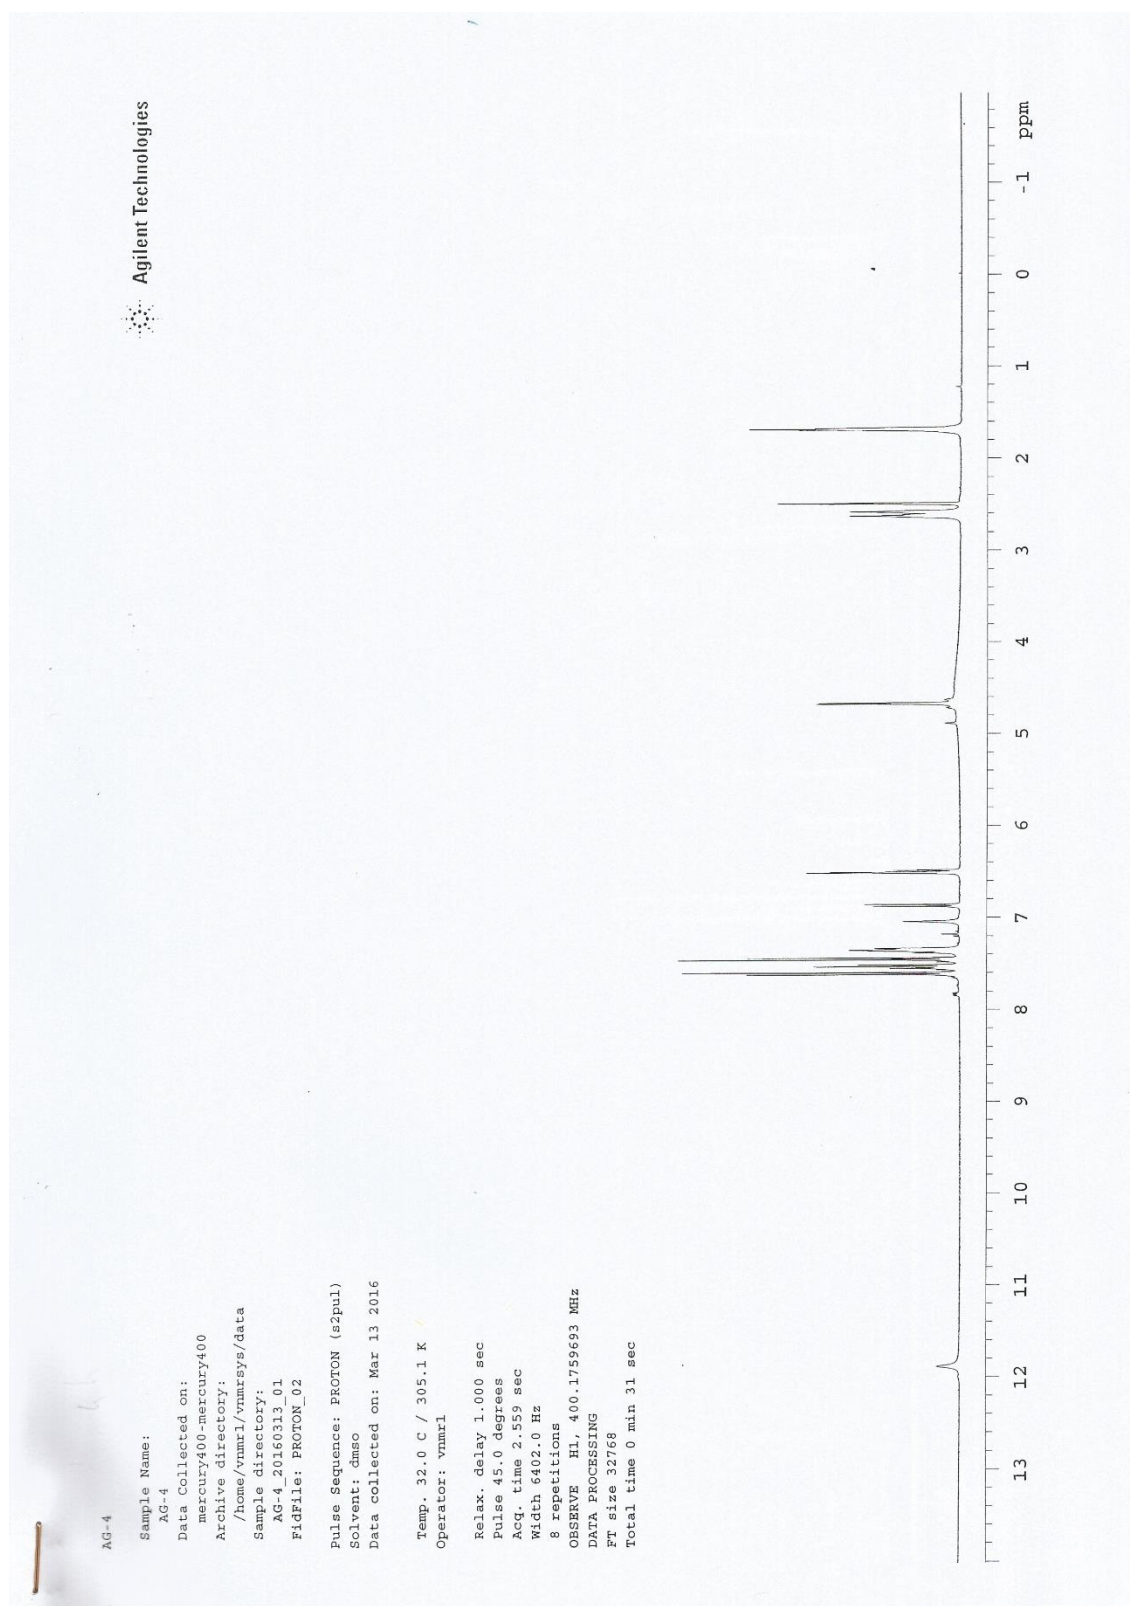



**$^{13}\text{C}$  NMR spectrum of the compound 4f**

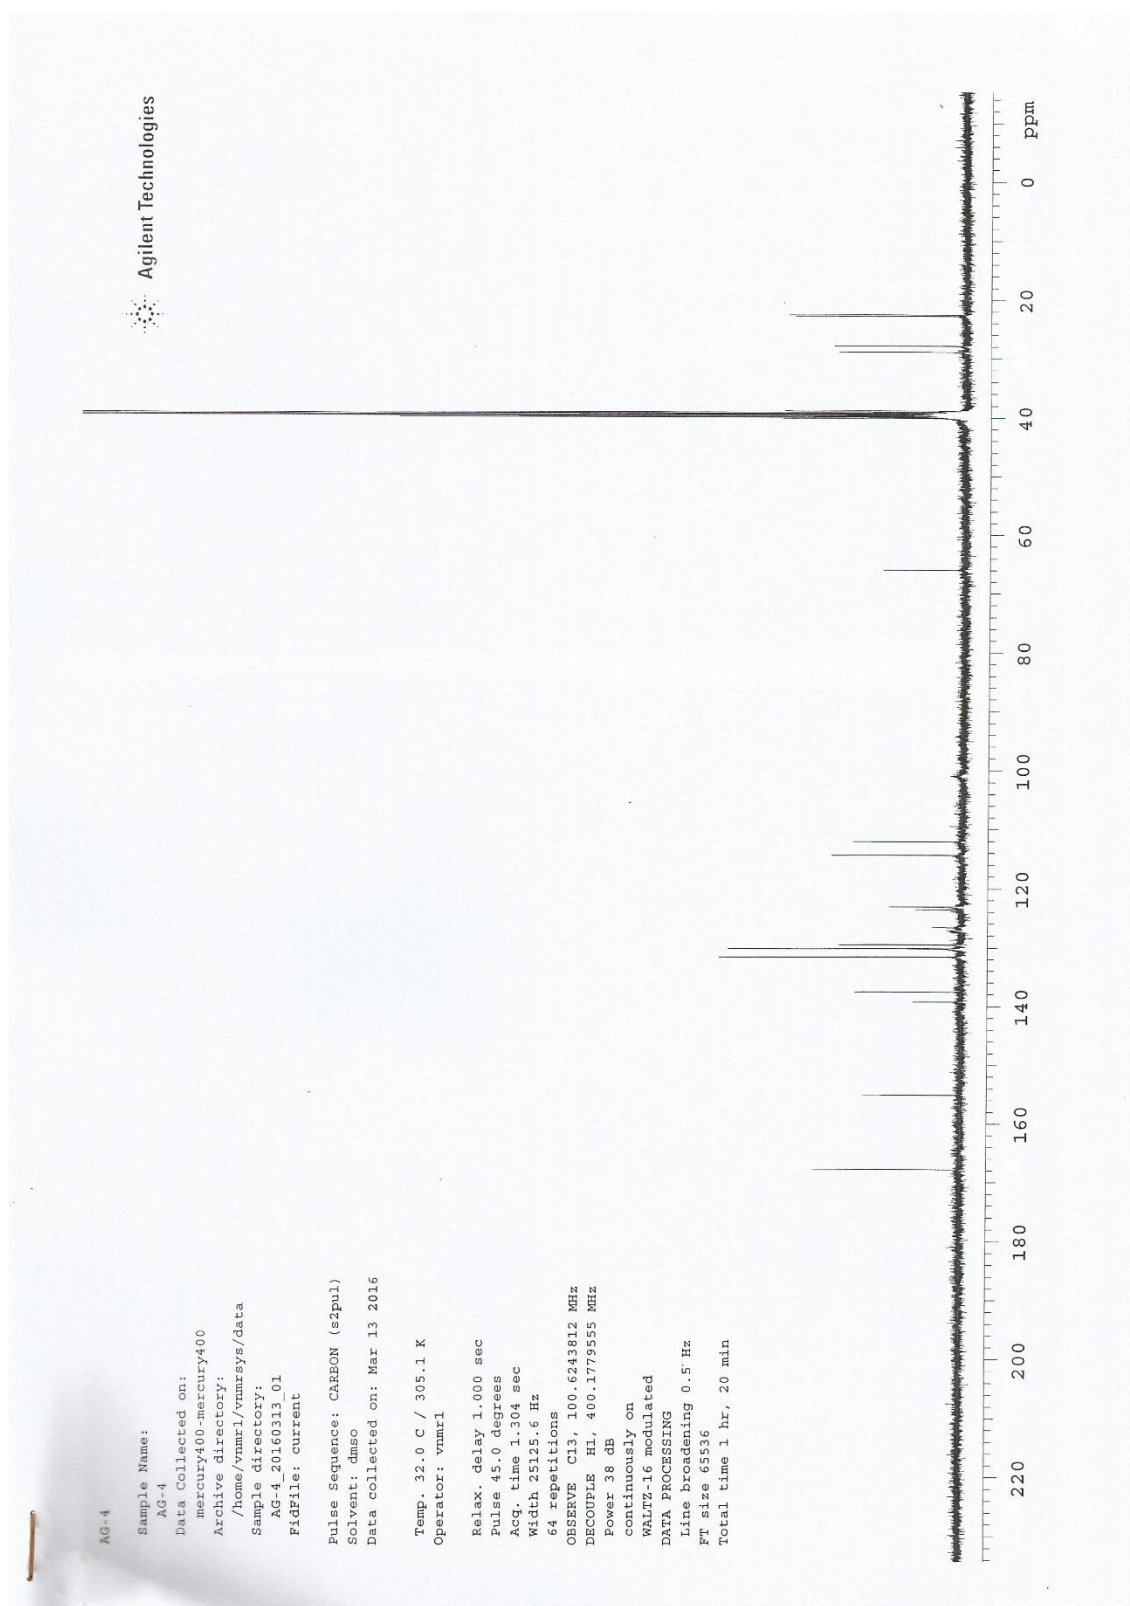

# **-IR spectrum of the compound 4g**

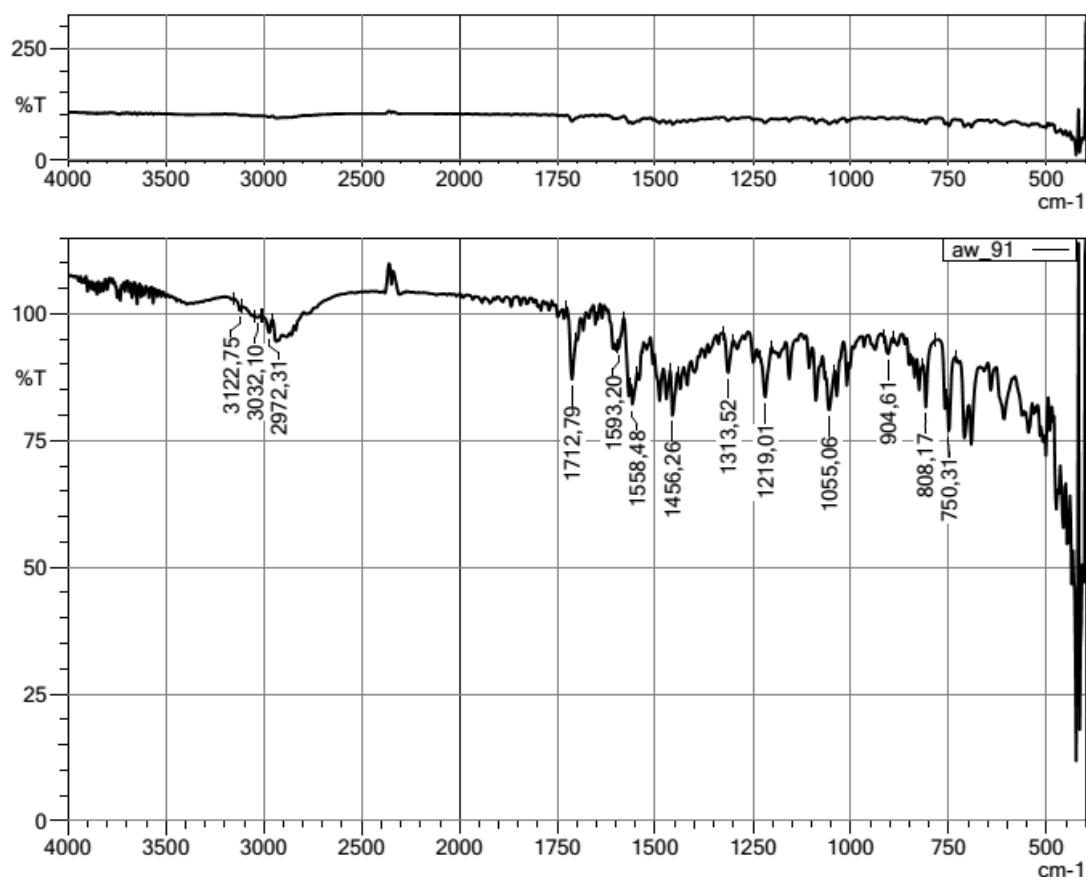

# **-HRMS spectrum of the compound 4g**

Data File: C:\LabSolutions\Data\Analiz\Lyuttas\AW-9\_10.lcd

| Elmt | Val. | Min | Max | Elmt | Val. | Min | Max | Elmt | Val. | Min | Max | Elmt | Val. | Min | Max | Use Adduct |
|------|------|-----|-----|------|------|-----|-----|------|------|-----|-----|------|------|-----|-----|------------|
| H    | 1    | 20  | 35  | O    | 2    | 2   | 4   | Cl   | 1    | 0   | 1   | I    | 3    | 0   | 0   | H          |
| C    | 4    | 26  | 30  | F    | 1    | 0   | 1   | Br   | 1    | 0   | 1   |      |      |     |     |            |
| N    | 3    | 3   | 4   | S    | 2    | 1   | 1   | Ru   | 2    | 0   | 0   |      |      |     |     |            |

Error Margin (ppm): 5  
 HC Ratio: unlimited  
 Max Isotopes: 3  
 MSn Iso RI (%): 10.00

DBE Range: not fixed  
 Apply N Rule: yes  
 Isotope RI (%): 1.00  
 MSn Logic Mode: AND

Electron Ions: both  
 Use MSn Info: no  
 Isotope Res: 10000  
 Max Results: 500

Event#: 1 MS(E+) Ret. Time : 7.960 -> 8.093 Scan# : 1195 -> 1215

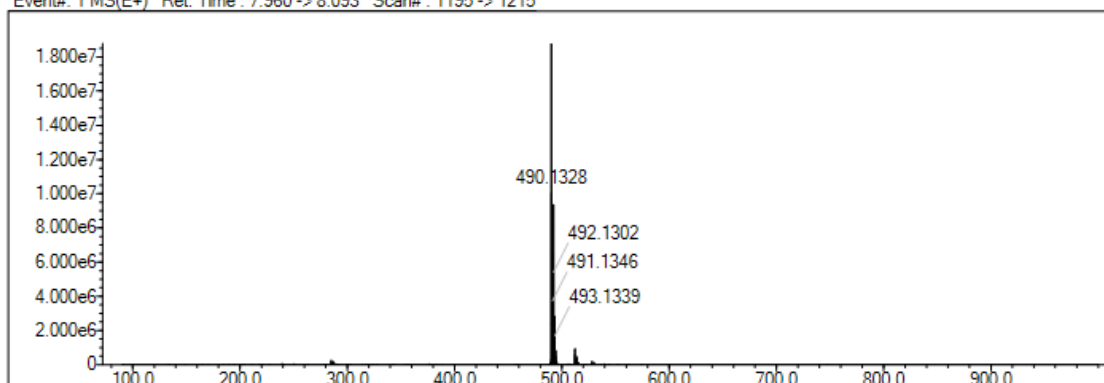



**$^1\text{H}$  NMR spectrum of the compound 4g**

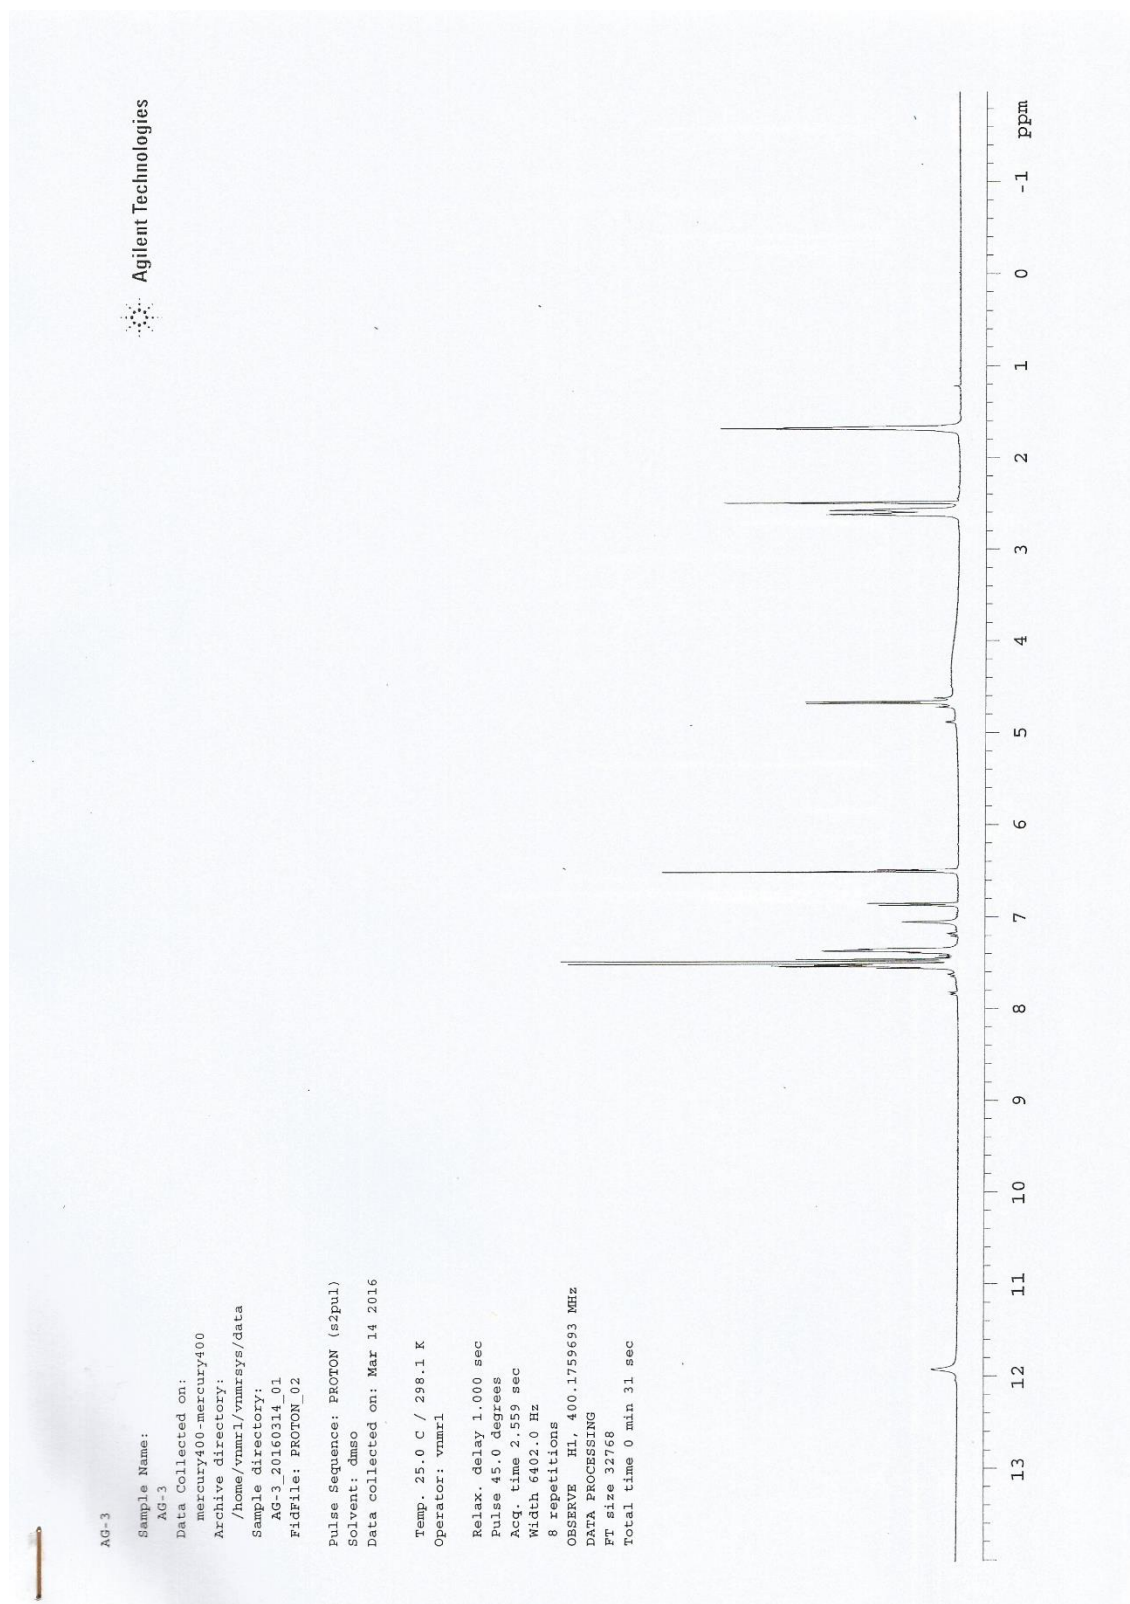

**$^{13}\text{C}$  NMR spectrum of the compound 4g**

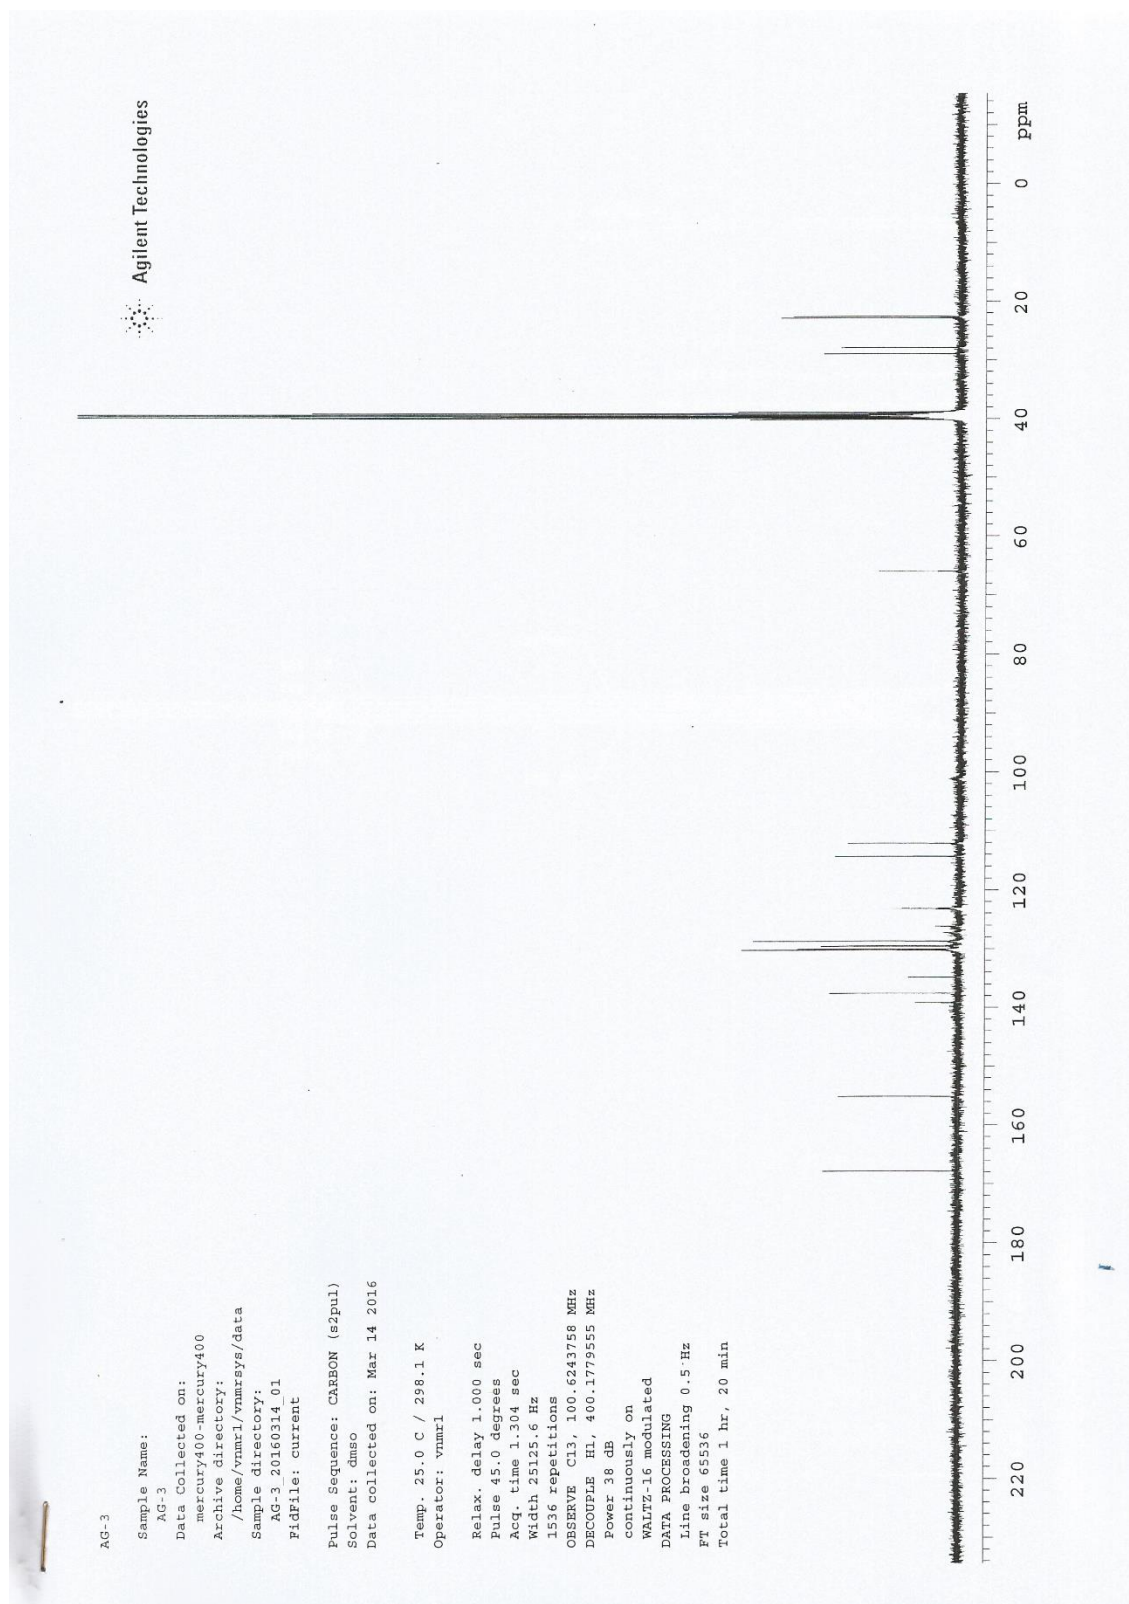

## -IR spectrum of the compound 4h

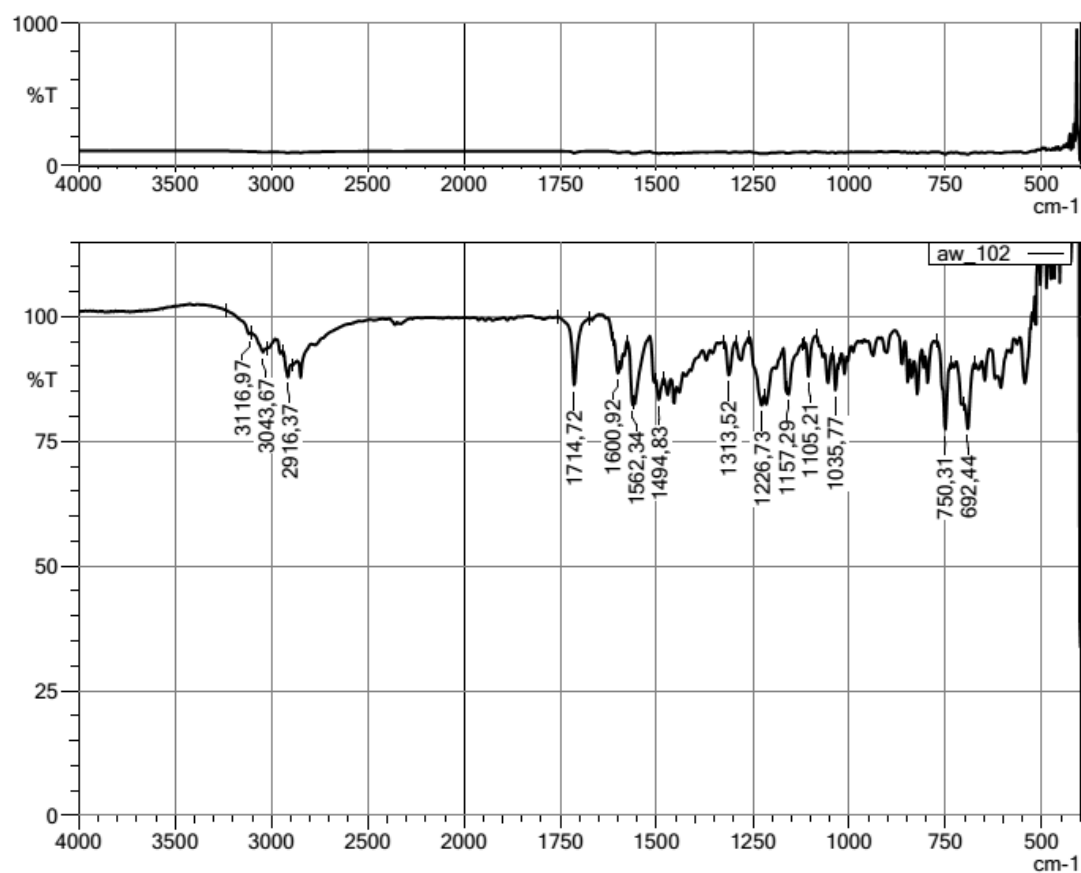

## -HRMS spectrum of the compound 4h

Data File: C:\LabSolutions\Data\Analiz\Lyuttas\AW-10\_13.lcd

| Elmt | Val. | Min | Max | Elmt | Val. | Min | Max | Elmt | Val. | Min | Max | Elmt | Val. | Min | Max | Use Adduct |
|------|------|-----|-----|------|------|-----|-----|------|------|-----|-----|------|------|-----|-----|------------|
| H    | 1    | 20  | 35  | O    | 2    | 2   | 4   | Cl   | 1    | 0   | 2   | I    | 3    | 0   | 0   | H          |
| C    | 4    | 26  | 30  | F    | 1    | 0   | 1   | Br   | 1    | 0   | 1   |      |      |     |     |            |
| N    | 3    | 3   | 4   | S    | 2    | 1   | 1   | Ru   | 2    | 0   | 0   |      |      |     |     |            |

Error Margin (ppm): 5  
 HC Ratio: unlimited  
 Max Isotopes: 3  
 MSn Iso RI (%): 10.00

DBE Range: not fixed  
 Apply N Rule: yes  
 Isotope RI (%): 1.00  
 MSn Logic Mode: AND

Electron Ions: both  
 Use MSn Info: no  
 Isotope Res: 10000  
 Max Results: 500

Event#: 1 MS(E+) Ret. Time : 7.480 -> 7.720 Scan#: 1123 -> 1159

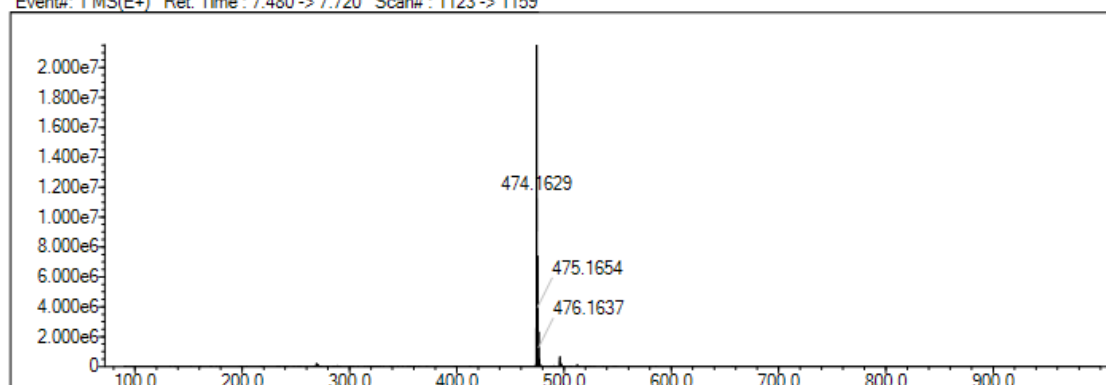

-  $^1\text{H}$  NMR spectrum of the compound 4h

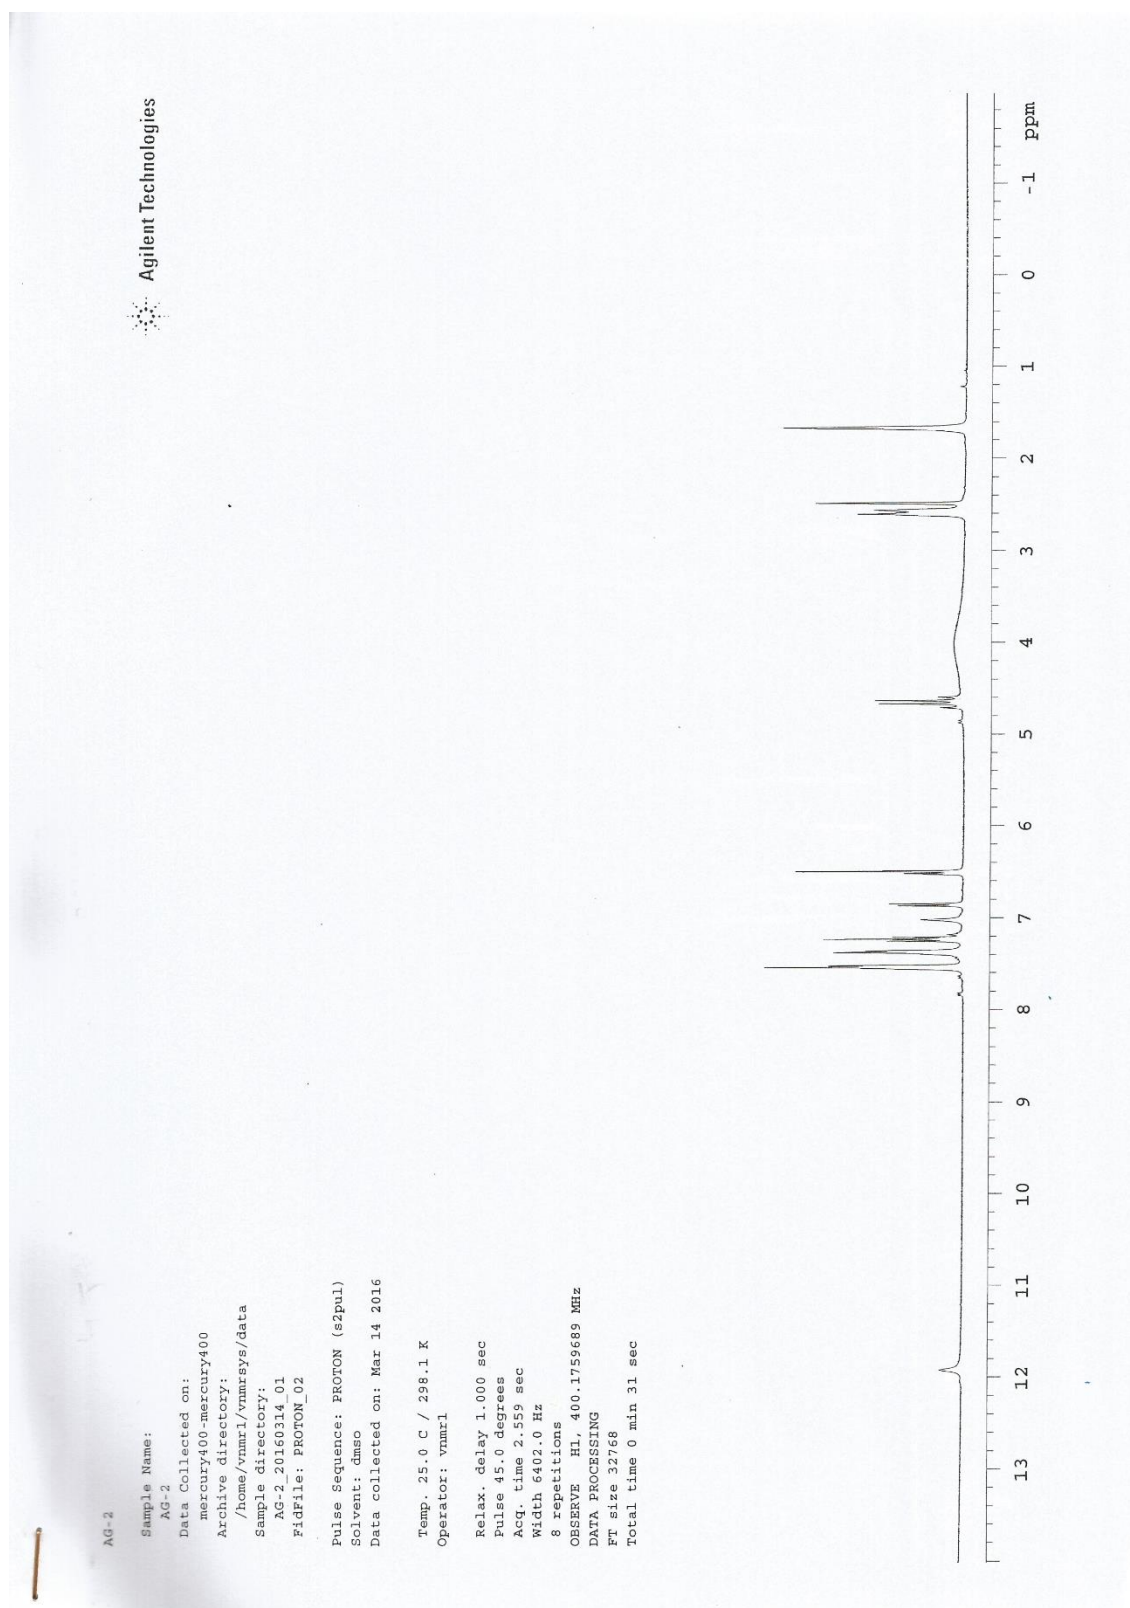



**$^{13}\text{C}$  NMR spectrum of the compound 4h**

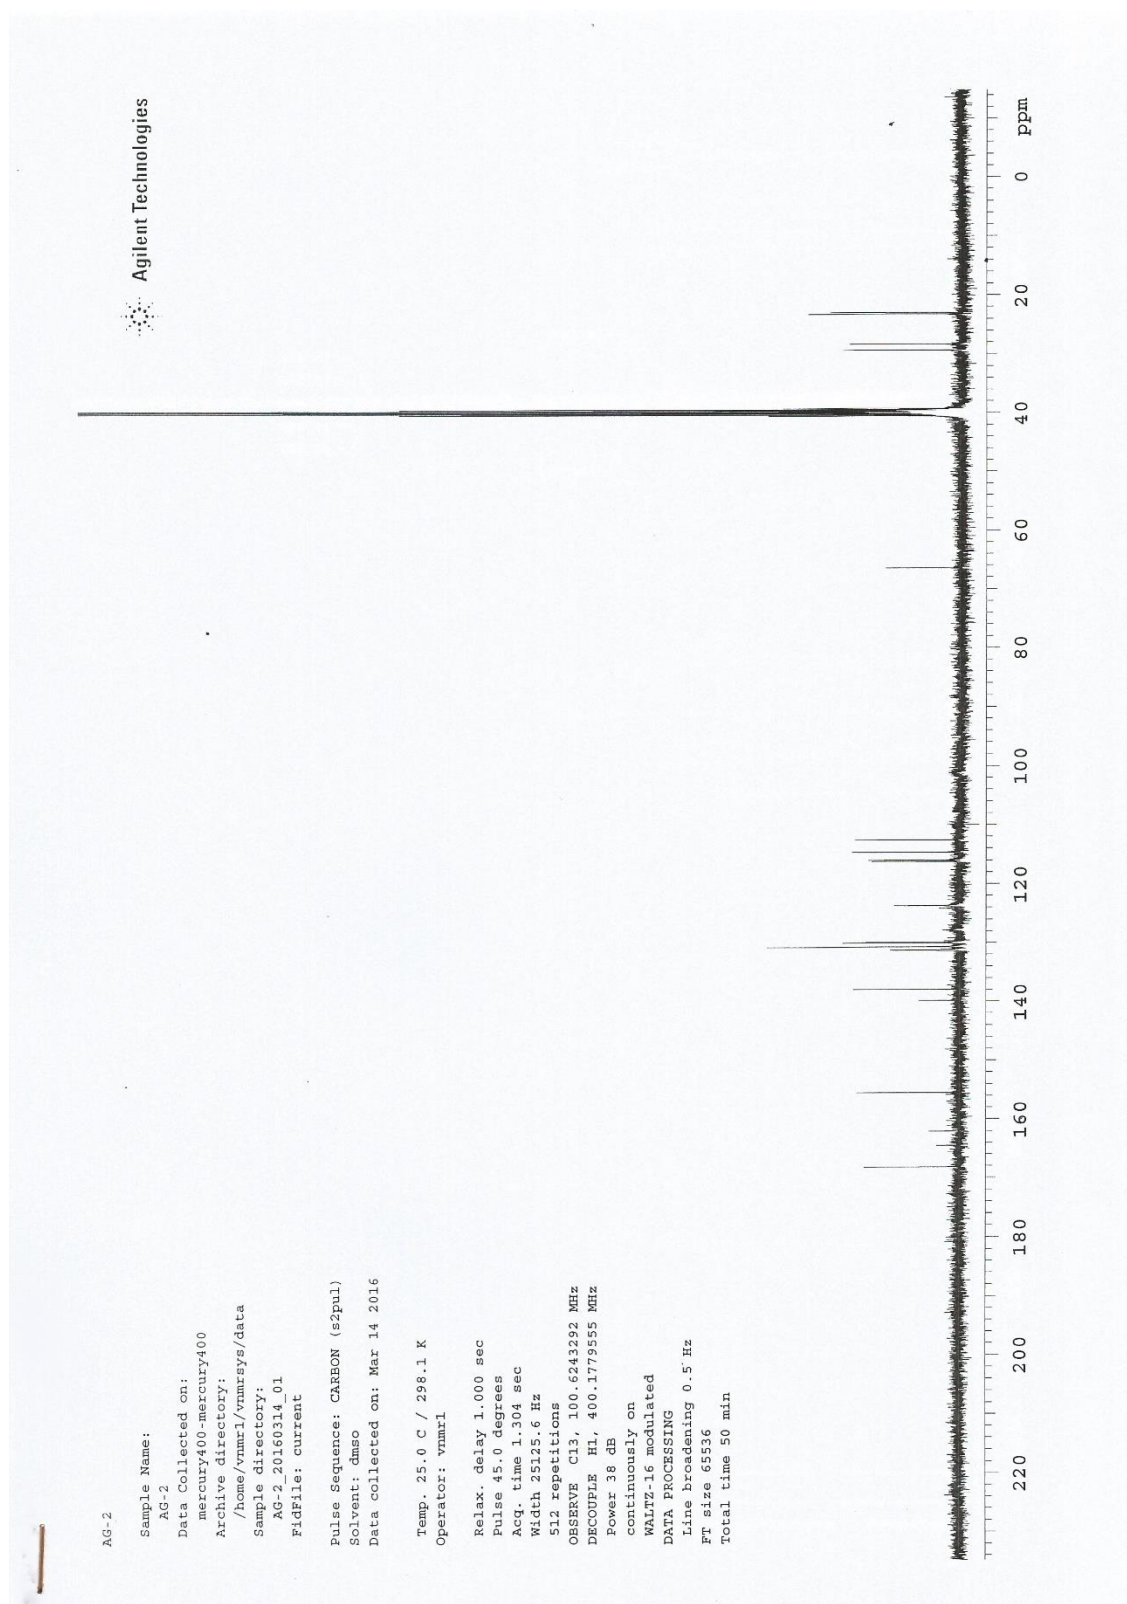

## -IR spectrum of the compound 4i

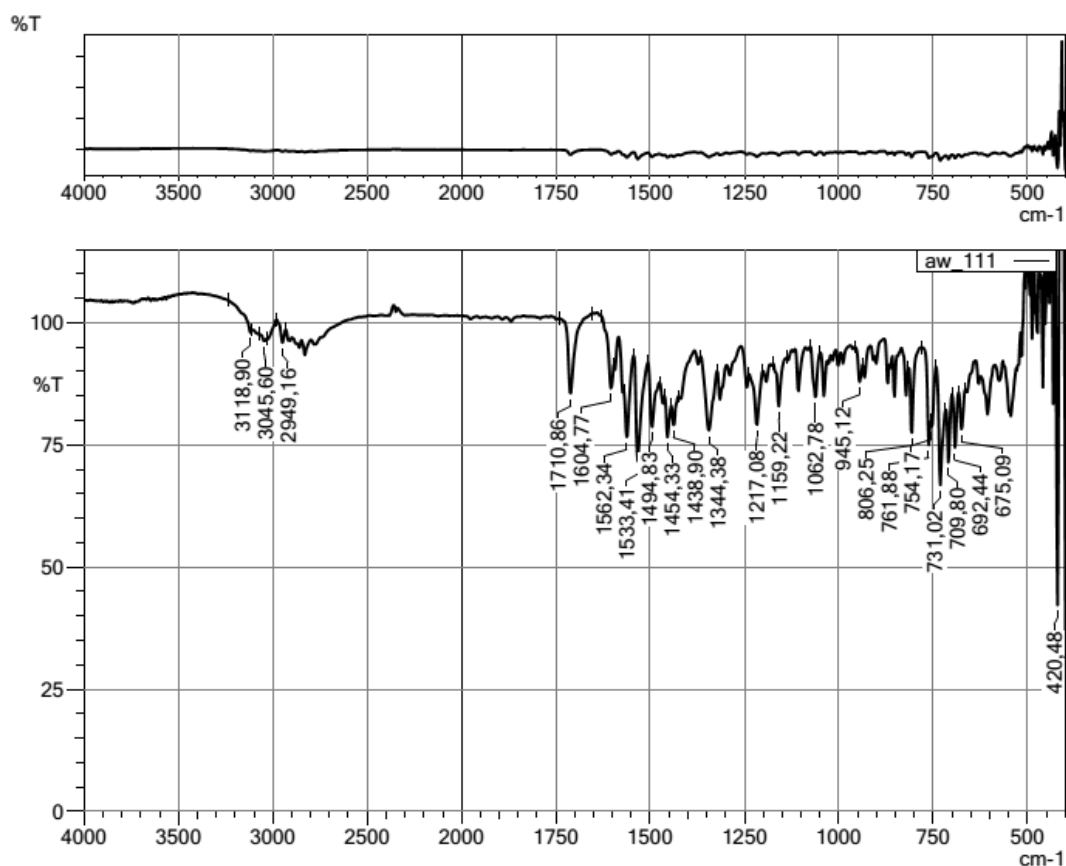

## -HRMS spectrum of the compound 4i

Data File: C:\LabSolutions\Data\Analiz\Lyuittas\AW-11\_10.lcd

| Elmt | Val. | Min | Max | Elmt | Val. | Min | Max | Elmt | Val. | Min | Max | Elmt | Val. | Min | Max | Use Adduct |
|------|------|-----|-----|------|------|-----|-----|------|------|-----|-----|------|------|-----|-----|------------|
| H    | 1    | 20  | 35  | O    | 2    | 2   | 4   | Cl   | 1    | 0   | 1   | I    | 3    | 0   | 0   | H          |
| C    | 4    | 26  | 30  | F    | 1    | 0   | 1   | Br   | 1    | 0   | 1   |      |      |     |     |            |
| N    | 3    | 3   | 4   | S    | 2    | 1   | 1   | Ru   | 2    | 0   | 0   |      |      |     |     |            |

Error Margin (ppm): 5  
 HC Ratio: unlimited  
 Max Isotopes: 3  
 MSn Iso RI (%): 10.00

DBE Range: not fixed  
 Apply N Rule: yes  
 Isotope RI (%): 1.00  
 MSn Logic Mode: AND

Electron Ions: both  
 Use MSn Info: no  
 Isotope Res: 10000  
 Max Results: 500

Event#: 1 MS(E+) Ret. Time: 7.640 -> 7.773 Scan#: 1147 -> 1167

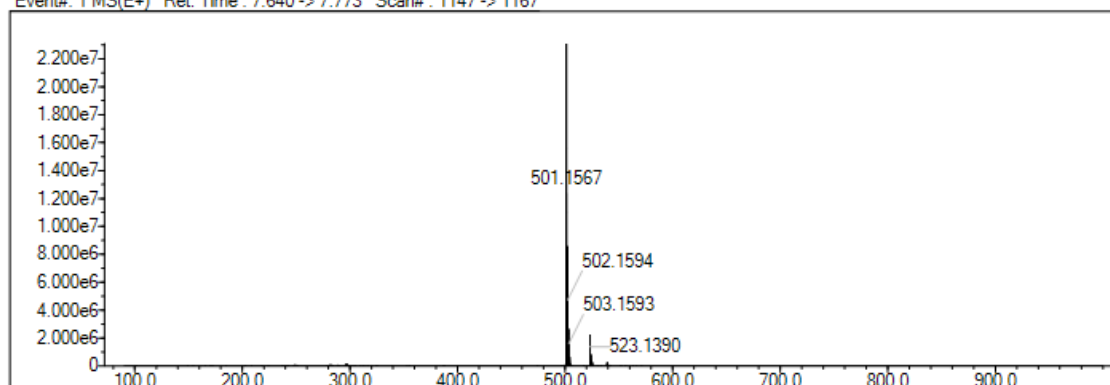



**$^1\text{H}$  NMR spectrum of the compound 4i**

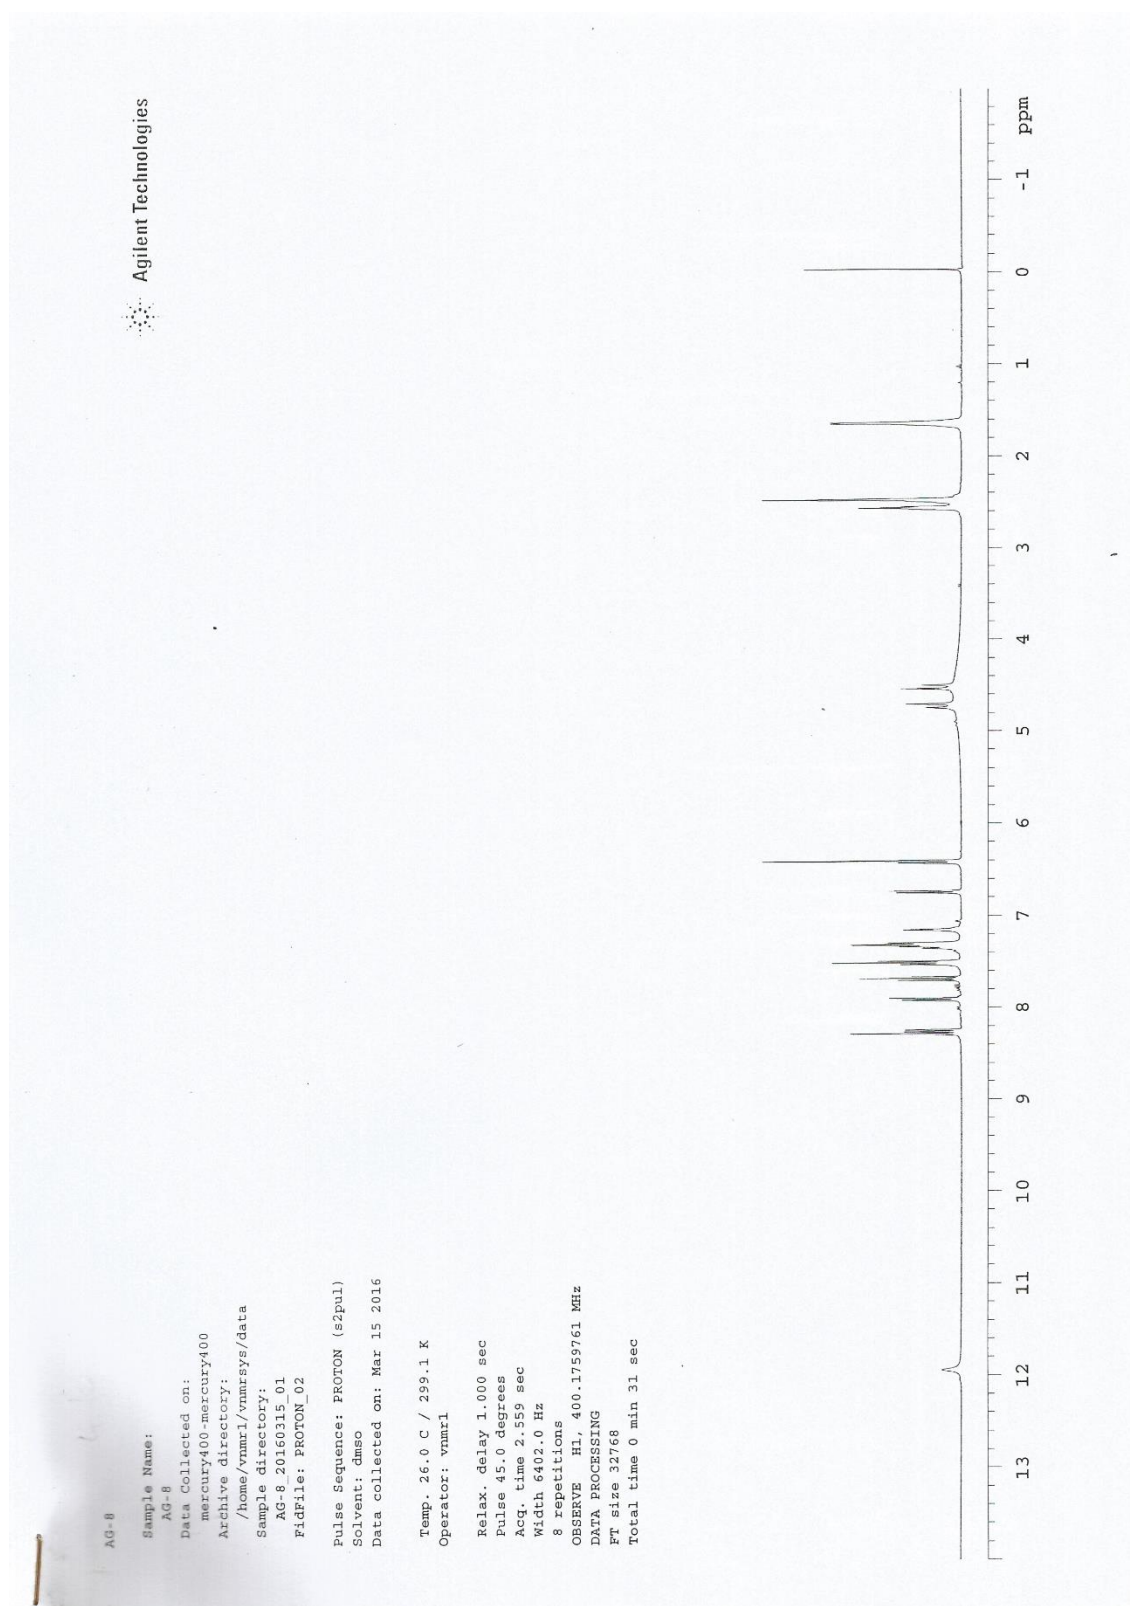

**$^{13}\text{C}$  NMR spectrum of the compound 4i**

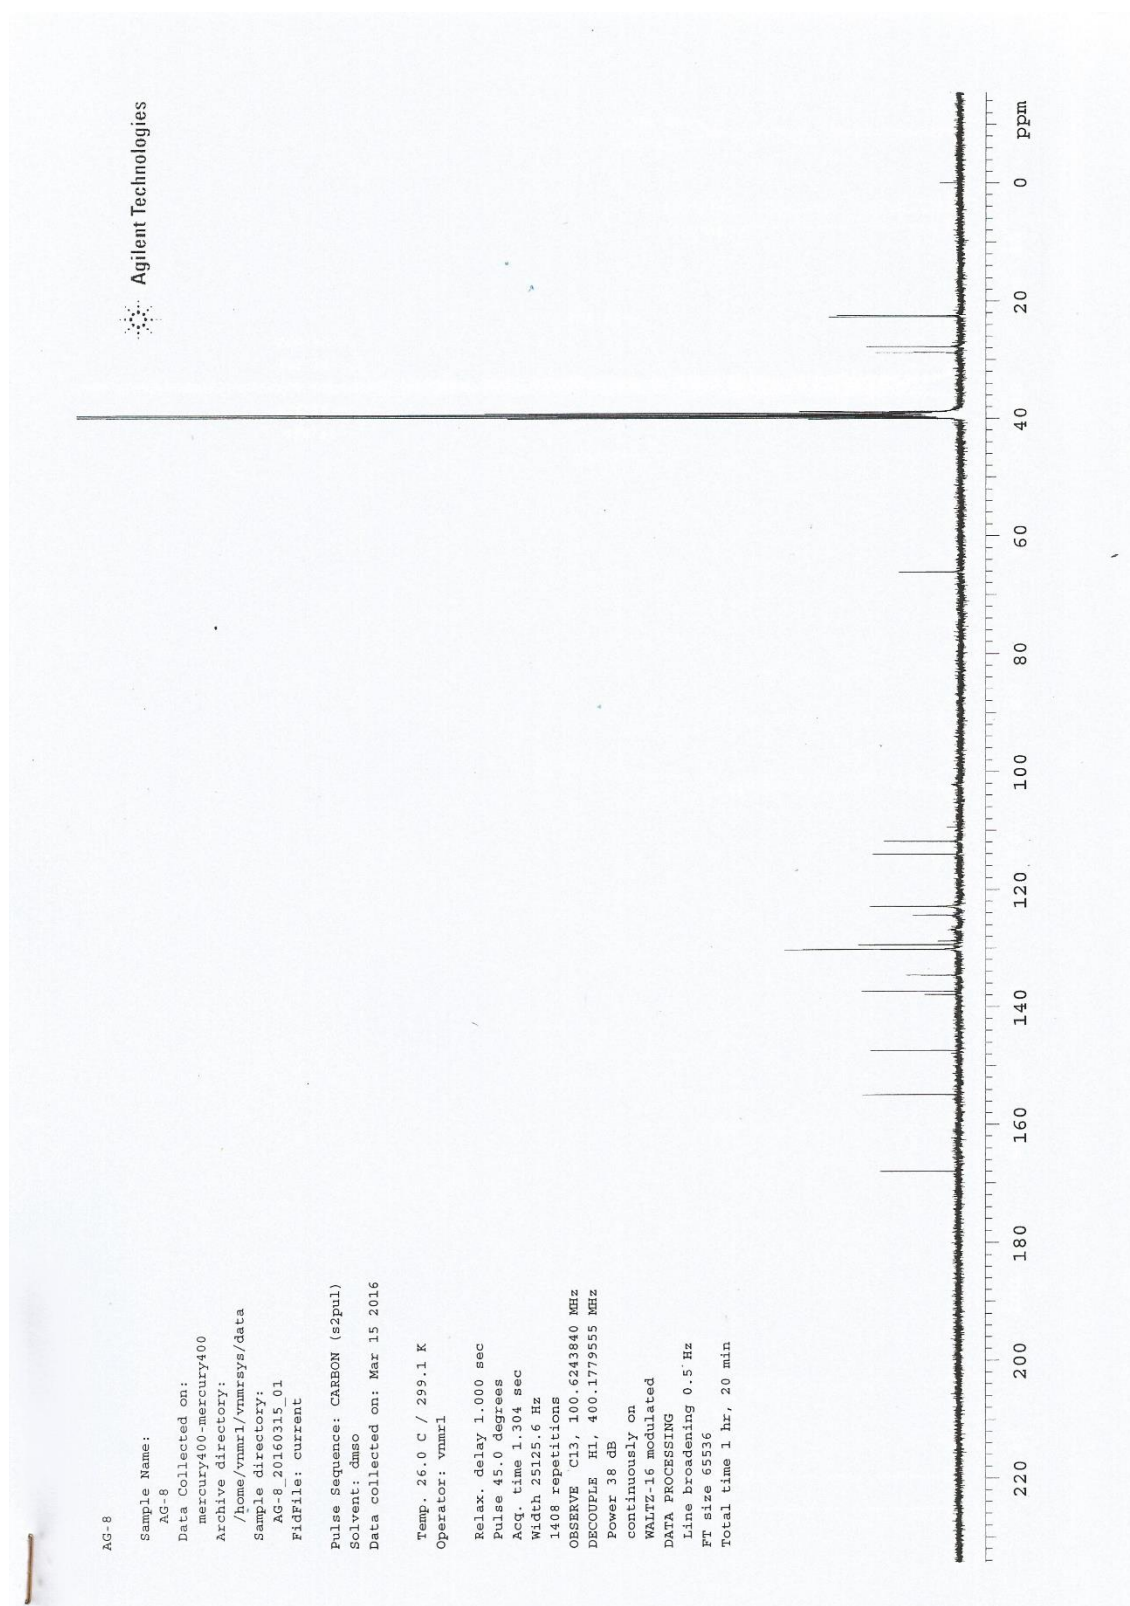

## -IR spectrum of the compound 4j

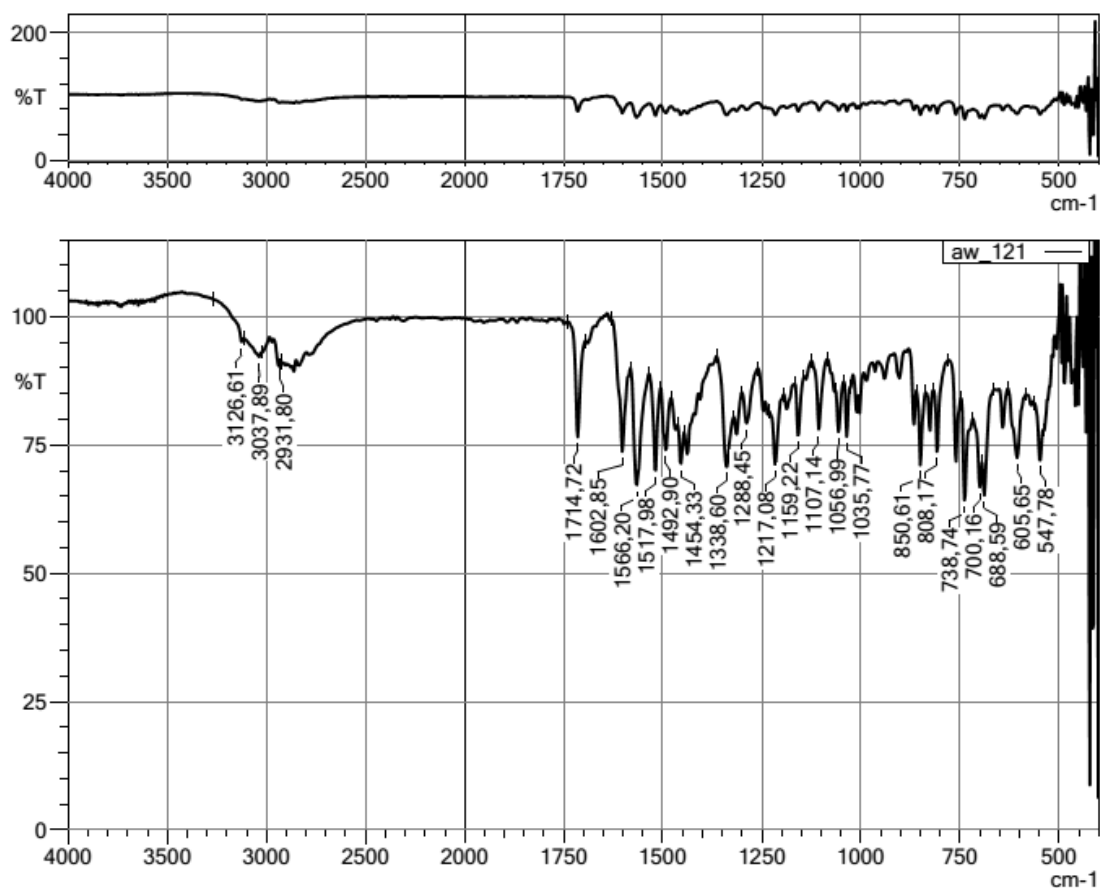

## -HRMS spectrum of the compound 4j

Data File: C:\LabSolutions\Data\Analiz\Lyttas\AW-12\_11.lcd

| Elmt | Val. | Min | Max | Elmt | Val. | Min | Max | Elmt | Val. | Min | Max | Elmt | Val. | Min | Max | Use Adduct |
|------|------|-----|-----|------|------|-----|-----|------|------|-----|-----|------|------|-----|-----|------------|
| H    | 1    | 20  | 35  | O    | 2    | 2   | 4   | Cl   | 1    | 0   | 1   | I    | 3    | 0   | 0   | H          |
| C    | 4    | 26  | 30  | F    | 1    | 0   | 1   | Br   | 1    | 0   | 1   |      |      |     |     |            |
| N    | 3    | 3   | 4   | S    | 2    | 1   | 1   | Ru   | 2    | 0   | 0   |      |      |     |     |            |

Error Margin (ppm): 5  
 HC Ratio: unlimited  
 Max Isotopes: 3  
 MSn Iso RI (%): 10.00

DBE Range: not fixed  
 Apply N Rule: yes  
 Isotope RI (%): 1.00  
 MSn Logic Mode: AND

Electron Ions: both  
 Use MSn Info: no  
 Isotope Res: 10000  
 Max Results: 500

Event#: 1 MS(E+) Ret. Time : 7.707 -> 7.920 Scan# : 1157 -> 1189

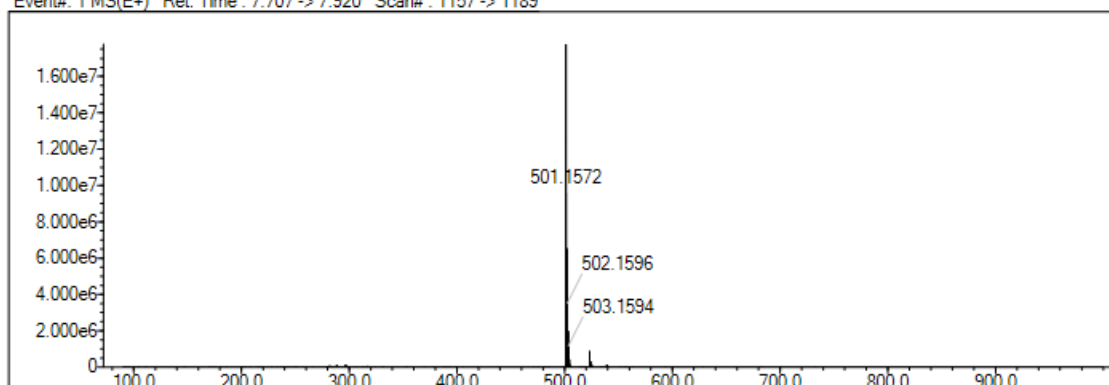

**$^1\text{H}$  NMR spectrum of the compound 4j**

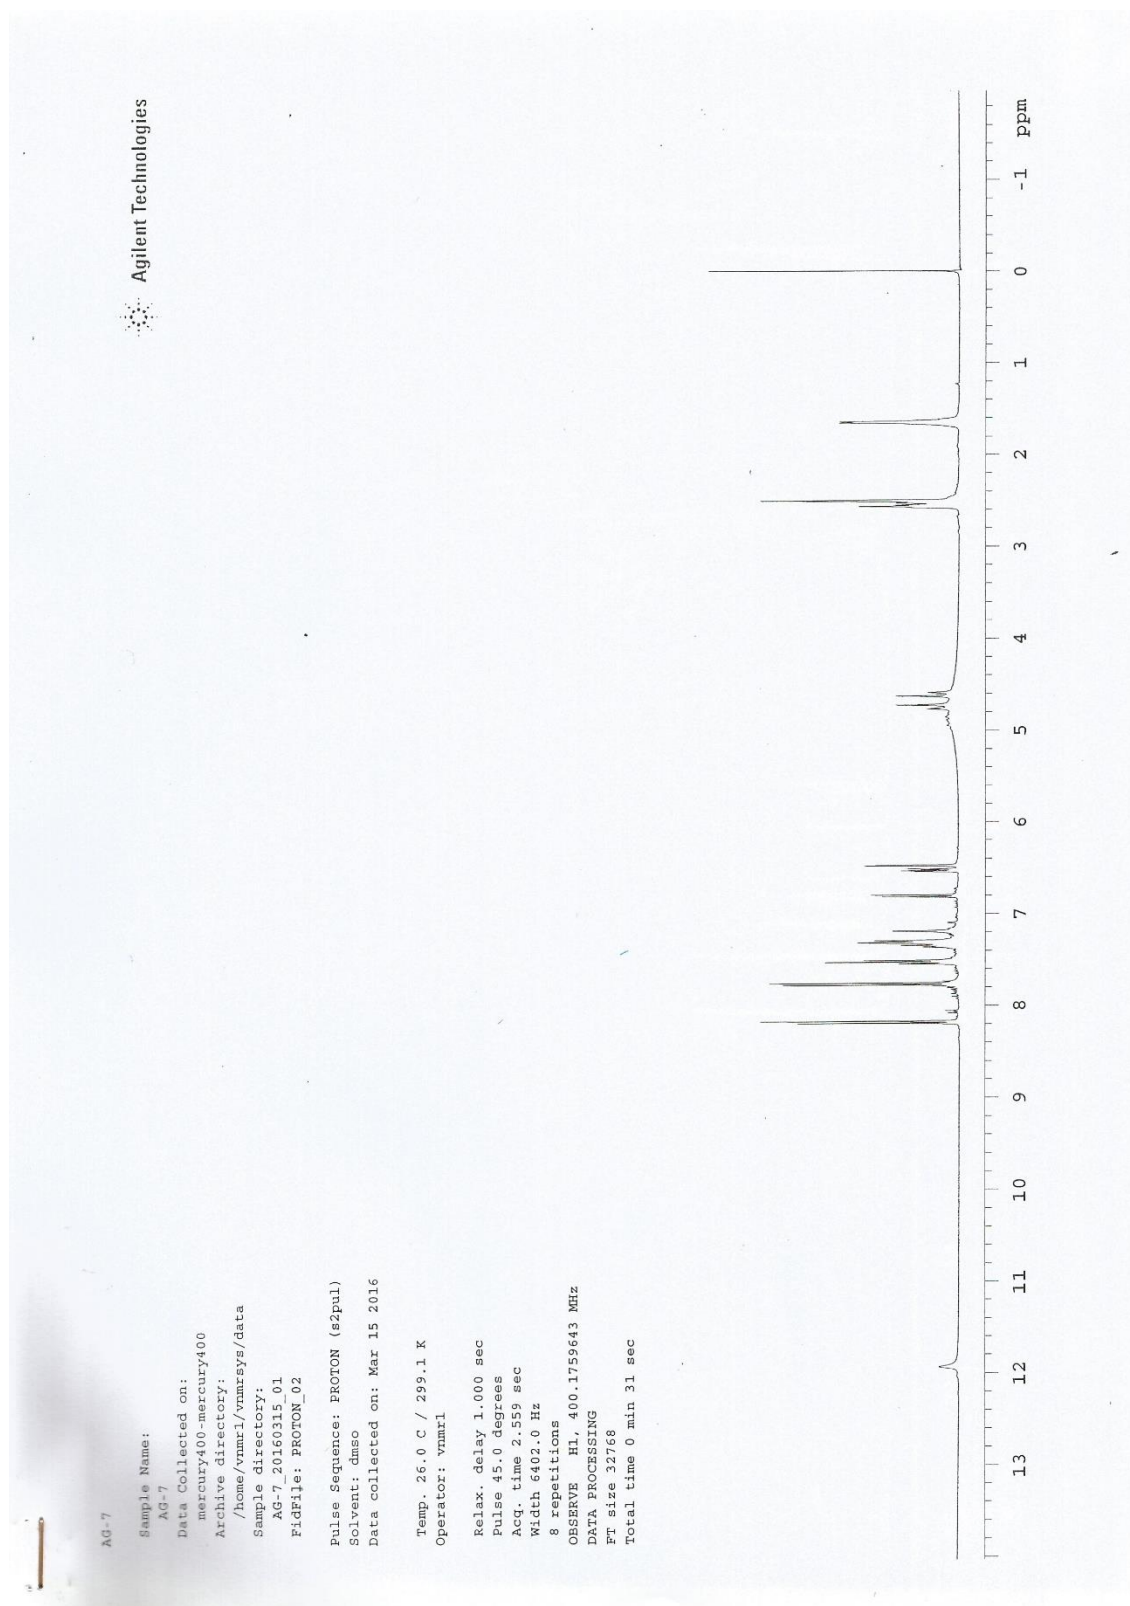



**$^{13}\text{C}$  NMR spectrum of the compound 4j**

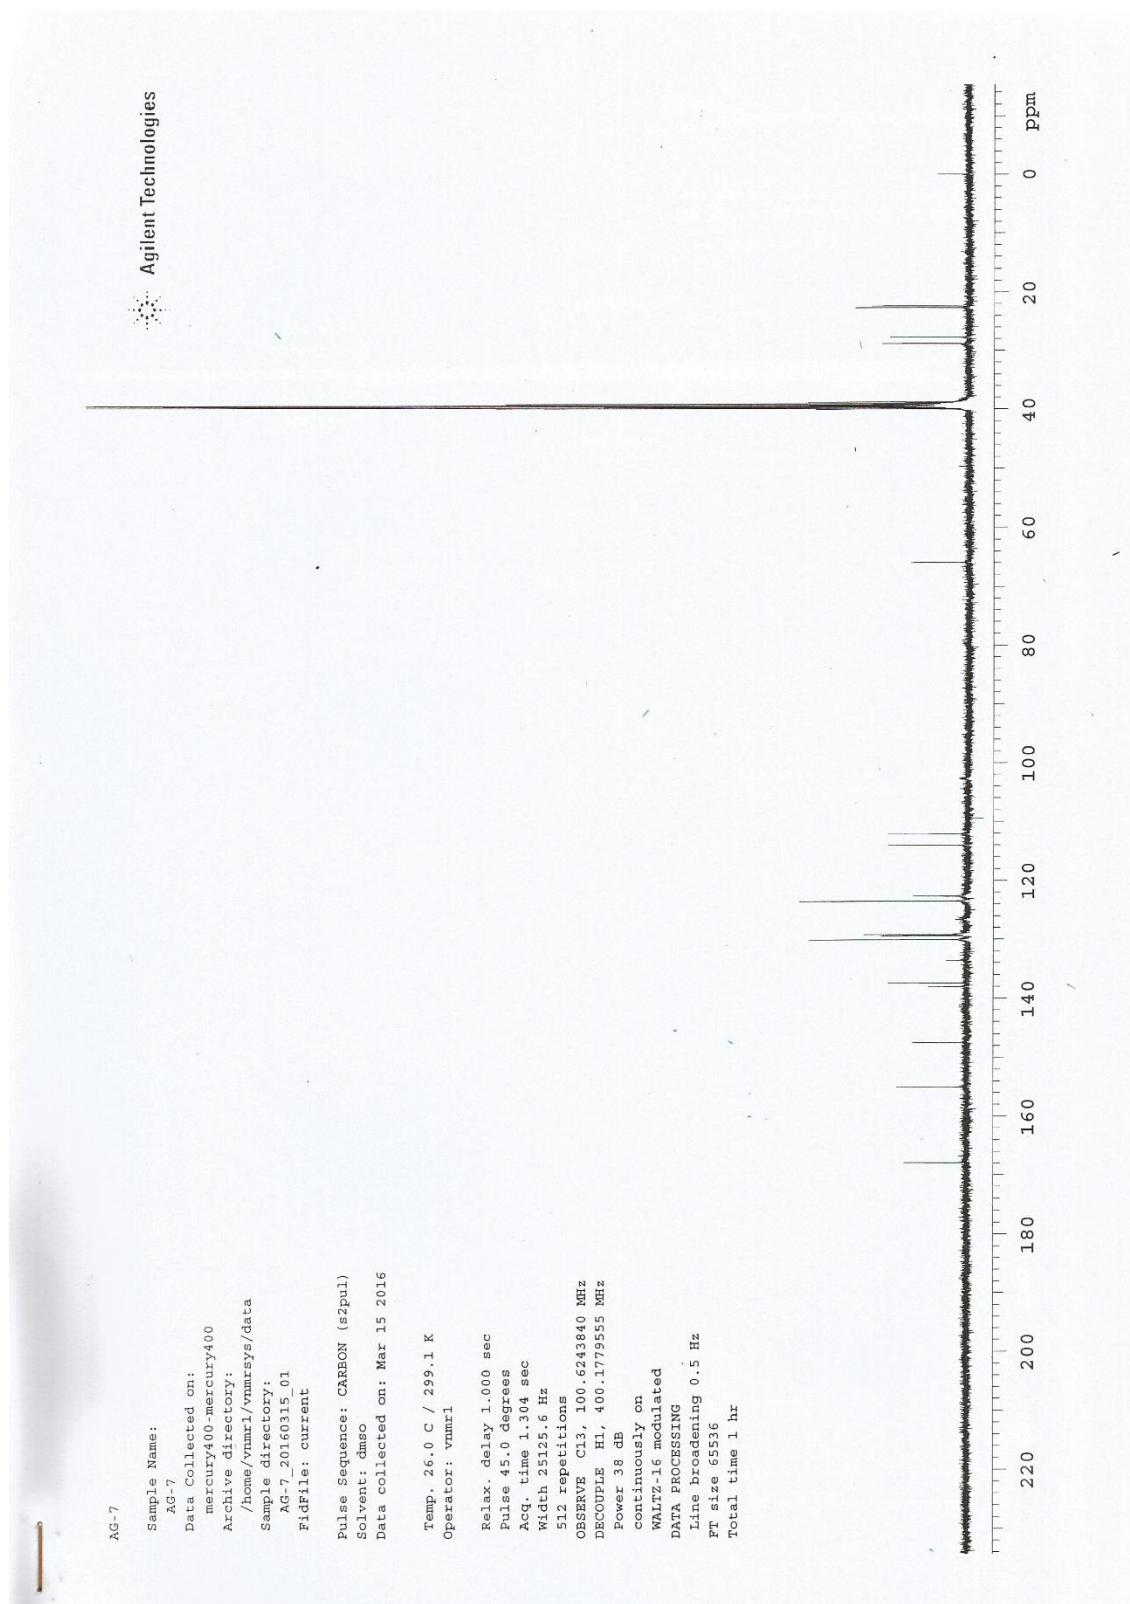

## - IR spectrum of the compound 4k

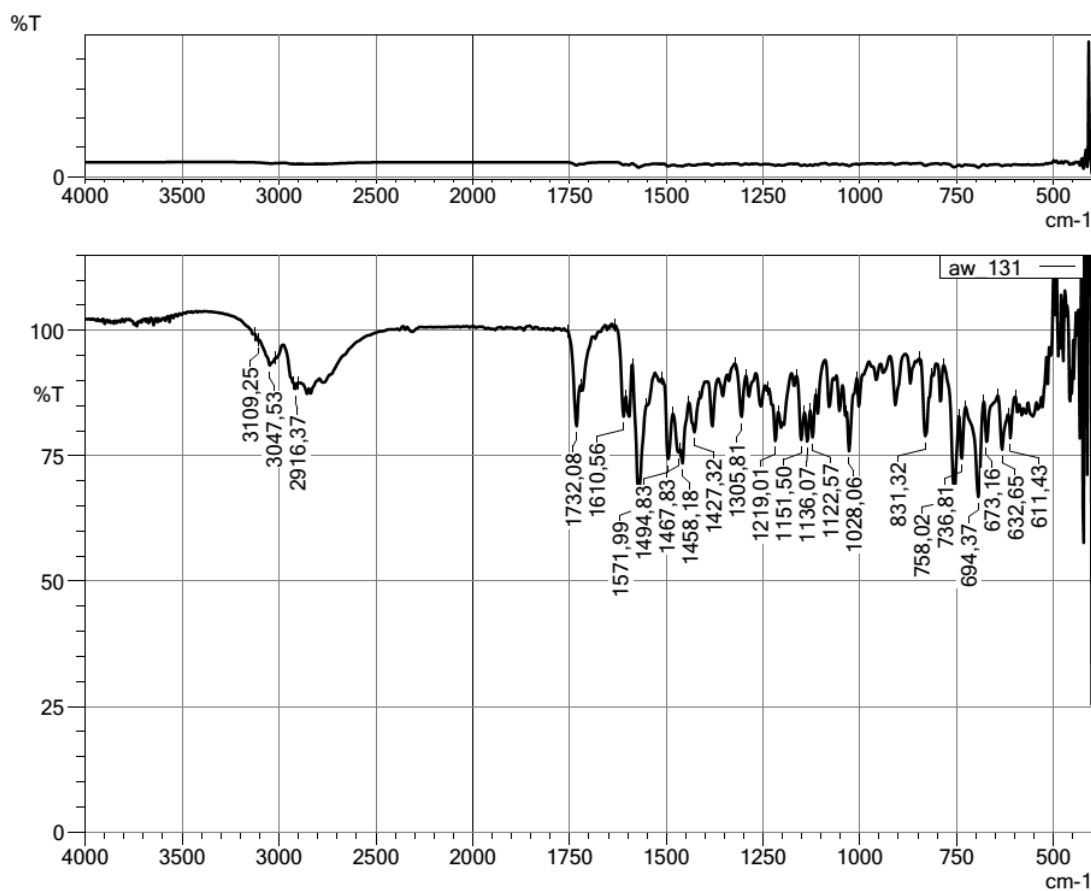

## -HRMS spectrum of the compound 4k

Data File: C:\LabSolutions\Data\Analizi\Lyuttas\AW-13\_12.lcd

| Elmt | Val. | Min | Max | Elmt | Val. | Min | Max | Elmt | Val. | Min | Max | Elmt | Val. | Min | Max | Use Adduct |
|------|------|-----|-----|------|------|-----|-----|------|------|-----|-----|------|------|-----|-----|------------|
| H    | 1    | 20  | 35  | O    | 2    | 2   | 4   | Cl   | 1    | 0   | 2   | I    | 3    | 0   | 0   | H          |
| C    | 4    | 26  | 30  | F    | 1    | 0   | 1   | Br   | 1    | 0   | 1   |      |      |     |     |            |
| N    | 3    | 3   | 4   | S    | 2    | 1   | 1   | Ru   | 2    | 0   | 0   |      |      |     |     |            |

Error Margin (ppm): 5  
 HC Ratio: unlimited  
 Max Isotopes: 3  
 MSn Iso RI (%): 10.00

DBE Range: not fixed  
 Apply N Rule: yes  
 Isotope RI (%): 1.00  
 MSn Logic Mode: AND

Electron Ions: both  
 Use MSn Info: no  
 Isotope Res: 10000  
 Max Results: 500

Event#: 1 MS(E+) Ret. Time: 8.840 Scan#: 1327

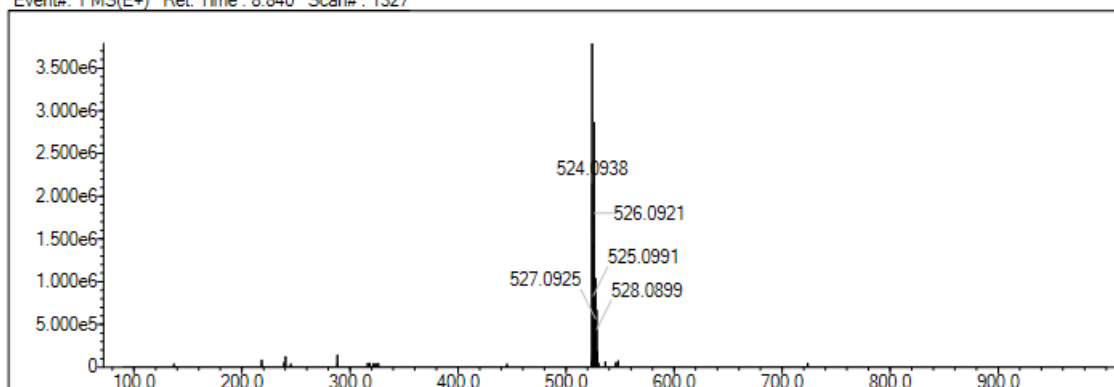



**$^1\text{H}$  NMR spectrum of the compound 4k**

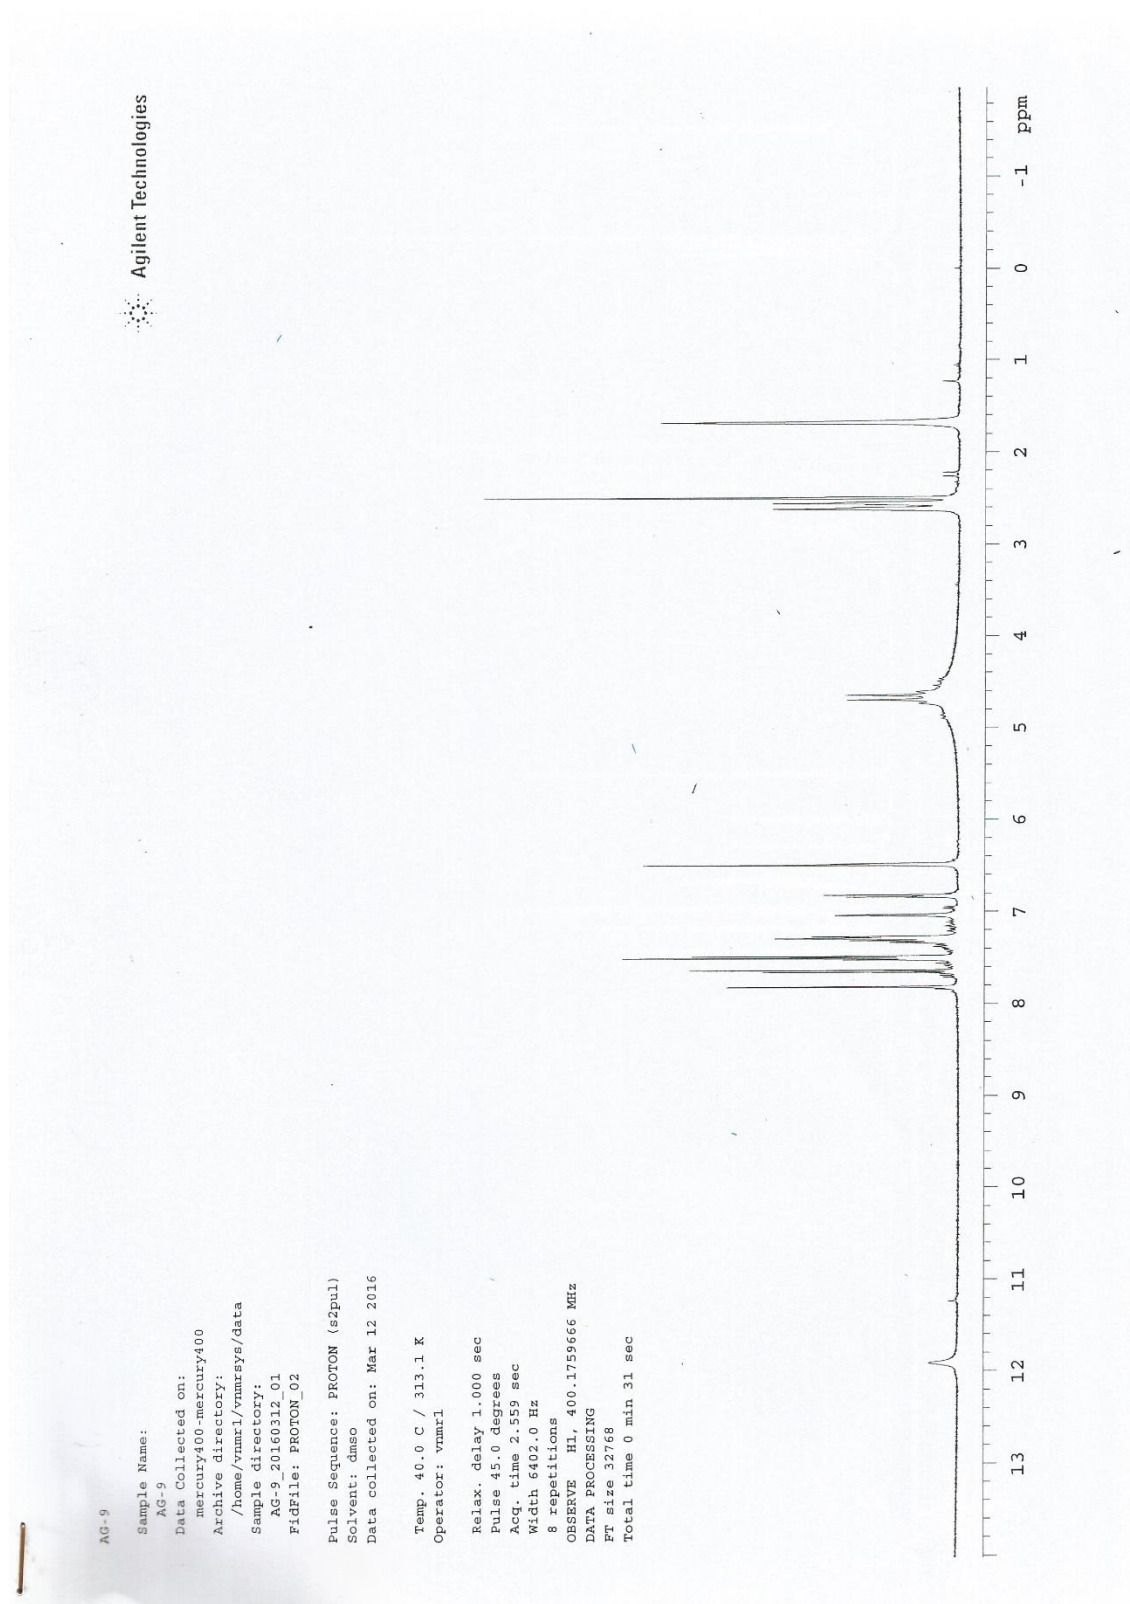

**$^{13}\text{C}$  NMR spectrum of the compound 4k**

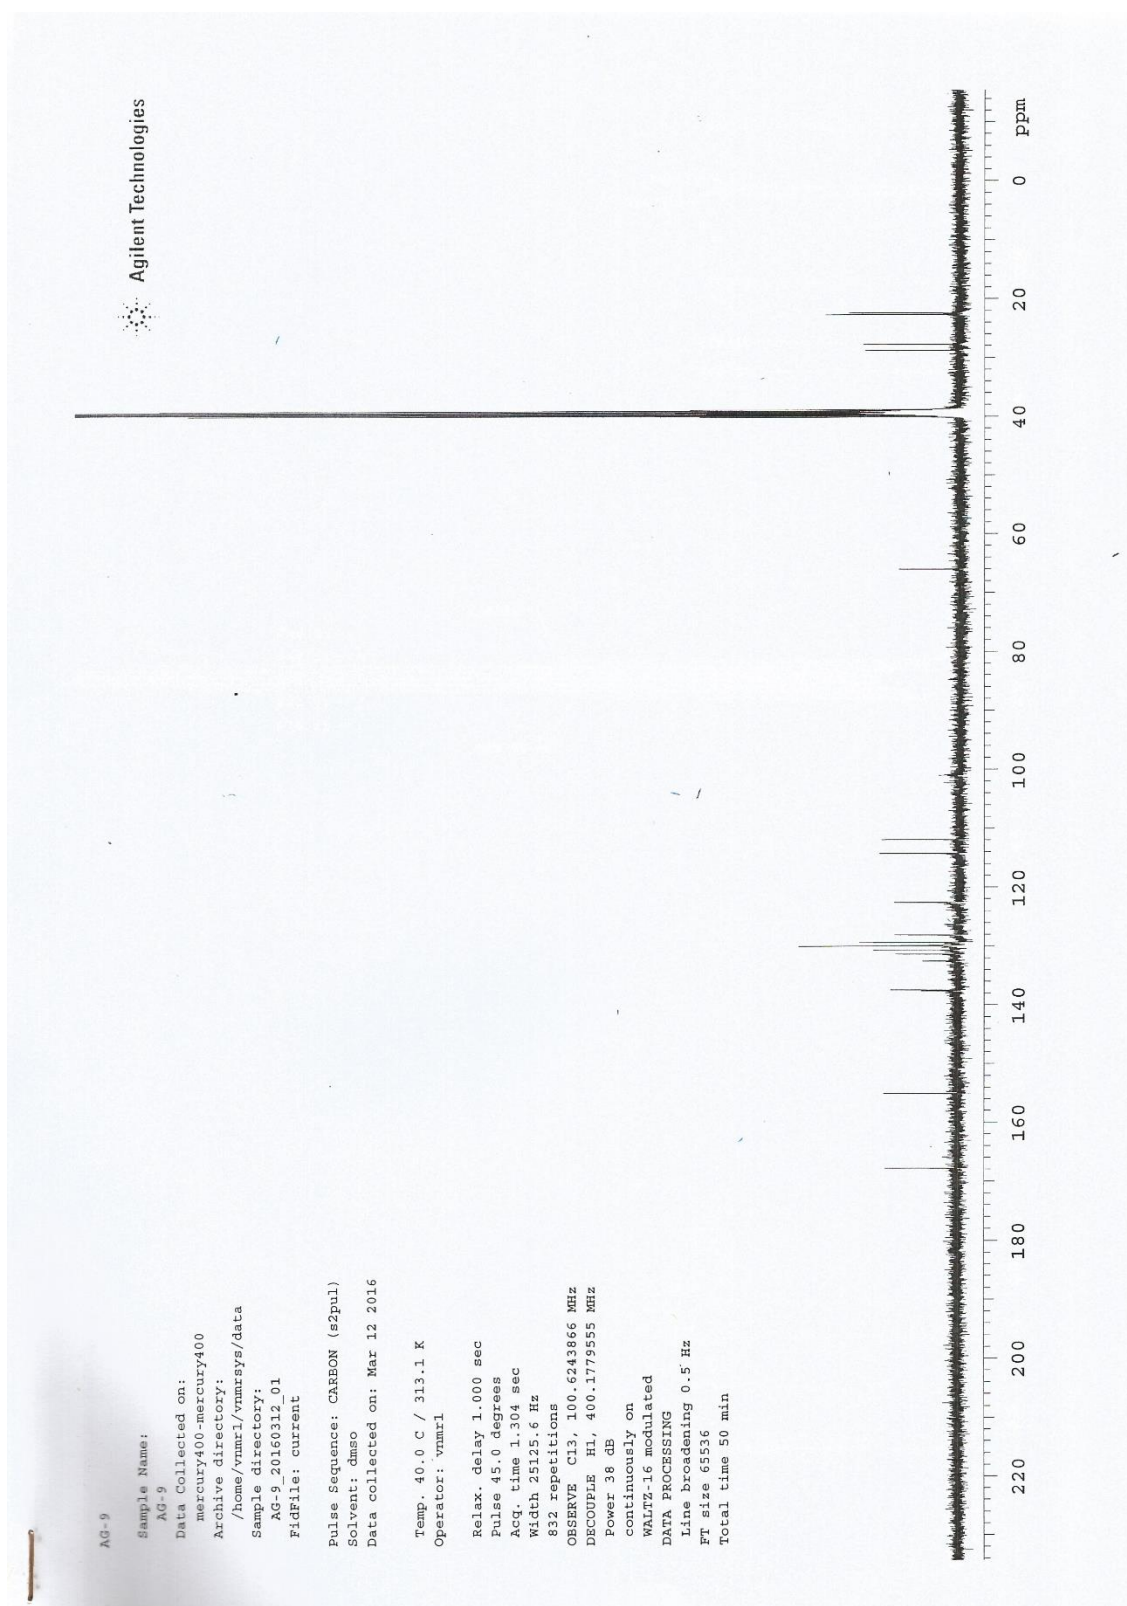

Supplement: s1 [file s1]
